# Supplementary material
Source: PubMed Central journal article supplement (PMC6583673)
Supplement: jamapsychiatry-76-700-s001.pdf [file jamapsychiatry-76-700-s001.pdf]

## Supplementary Online Content

Cuijpers P, Noma H, Karyotaki E, Cipriani A, Furukawa TA. Effectiveness and acceptability of cognitive behavior therapy delivery formats in adults with depression: a network meta-analysis. *JAMA Psychiatry*. Published online April 17, 2019. doi:10.1001/jamapsychiatry.2019.0268

**eAppendix A.** Search String for PubMed

**eAppendix B.** PRISMA Flowchart

**eAppendix C.** Table With Selected Characteristics of Included Studies

**eAppendix D.** References of Included Studies

**eAppendix E.** Contribution Plot

**eAppendix F.** Forest Plots of Comparisons With More than 10 Effect Sizes

**eAppendix G.** Network Meta-analysis of Treatment Formats of CBT for Adult Depression: Effect Sizes and Acceptability, With 95% Confidence Intervals and Prediction Intervals (including Pill Placebo)

**eAppendix H.** Characteristics of Included Studies Across the Different Comparisons

**eAppendix I.** Inconsistency Factors for the Network

**eAppendix J.** GRADE Ratings for All Contrasts

**eAppendix K.** Long Term Effects of Different Treatment Formats and Control Conditions in CBT

**eAppendix L.** Metaregression Analyses

**eAppendix M.** Sensitivity Analyses: Only Studies With Low Risk of Bias

**eAppendix N.** Sensitivity Analyses: Outliers Excluded

**eAppendix O.** Sensitivity Analyses: Non-internet-based Guided and Unguided Interventions Excluded

**eAppendix P.** Sensitivity Analyses of Acceptability: Non-internet-based Guided and Unguided Interventions Excluded

This supplementary material has been provided by the authors to give readers additional information about their work.

## Table of Contents

|                                                                                                                |    |
|----------------------------------------------------------------------------------------------------------------|----|
| Appendix A. Search string for PubMed.....                                                                      | 3  |
| Appendix B. PRISMA flowchart.....                                                                              | 5  |
| Appendix C. Table with selected characteristics of included studies.....                                       | 6  |
| Appendix D. References of included studies.....                                                                | 11 |
| Appendix E. Contribution plot <sup>a)</sup> .....                                                              | 20 |
| Appendix F. Forest plots of comparisons with more than 10 effect sizes.....                                    | 21 |
| Appendix G. Network meta-analysis of treatment formats of CBT: Effect sizes and acceptability.....             | 25 |
| Appendix H. Characteristics of included studies across the different comparisons.....                          | 26 |
| Appendix I. Inconsistency factors for the network.....                                                         | 27 |
| Appendix J. GRADE ratings for all contrasts.....                                                               | 28 |
| Appendix K. Long term effects of different treatment formats and control conditions in CBT <sup>a)</sup> ..... | 30 |
| Appendix L. Metaregression analyses.....                                                                       | 31 |
| Appendix M. Sensitivity analyses: Only studies with low risk of bias.....                                      | 32 |
| Appendix N. Sensitivity analyses: Outliers excluded.....                                                       | 33 |
| Appendix O. Sensitivity analyses: Non-internet-based interventions excluded.....                               | 34 |
| Appendix P. Sensitivity analyses of acceptability: Non-internet-based interventions excluded.....              | 35 |

## eAppendix A. Search String for PubMed

(Psychotherapy [MH] OR psychotherap\*[All Fields] OR cbt[All Fields] OR "behavior therapies"[All Fields] OR "behavior therapy"[All Fields] OR "behavior therapeutic"[All Fields] OR "behavior therapeutical"[All Fields] OR "behavior therapeutics"[All Fields] OR "behavior therapist"[All Fields] OR "behavior therapists"[All Fields] OR "behavior treatment"[All Fields] OR "behavior treatments"[All Fields] OR "behaviors therapies"[All Fields] OR "behaviors therapy"[All Fields] OR "behaviors therapeutics"[All Fields] OR "behaviors therapeutic"[All Fields] OR "behaviors therapeutical"[All Fields] OR "behaviors therapist"[All Fields] OR "behaviors therapists"[All Fields] OR "behaviors treatment"[All Fields] OR "behaviors treatments"[All Fields] OR "behavioral therapies"[All Fields] OR "behavioral therapy"[All Fields] OR "behavioral therapeutics"[All Fields] OR "behavioral therapeutic"[All Fields] OR "behavioral therapeutical"[All Fields] OR "behavioral therapist"[All Fields] OR "behavioral therapists"[All Fields] OR "behavioral treatment"[All Fields] OR "behavioral treatments"[All Fields] OR "behaviour therapies"[All Fields] OR "behaviour therapy"[All Fields] OR "behaviour therapeutic"[All Fields] OR "behaviour therapeutical"[All Fields] OR "behaviour therapeutics"[All Fields] OR "behaviour therapist"[All Fields] OR "behaviour therapists"[All Fields] OR "behaviour treatment"[All Fields] OR "behaviour treatments"[All Fields] OR "behaviours therapies"[All Fields] OR "behaviours therapy"[All Fields] OR "behaviours therapeutics"[All Fields] OR "behaviours therapeutic"[All Fields] OR "behaviours therapeutical"[All Fields] OR "behaviours therapist"[All Fields] OR "behaviours therapists"[All Fields] OR "behaviours treatment"[All Fields] OR "behaviours treatments"[All Fields] OR "behavioural therapies"[All Fields] OR "behavioural therapy"[All Fields] OR "behavioural therapeutics"[All Fields] OR "behavioural therapeutic"[All Fields] OR "behavioural therapeutical"[All Fields] OR "behavioural therapist"[All Fields] OR "behavioural therapists"[All Fields] OR "behavioural treatment"[All Fields] OR "behavioural treatments"[All Fields] OR "cognition therapies"[All Fields] OR "cognition therapie"[All Fields] OR "cognition therapy"[All Fields] OR "cognition therapeutical"[All Fields] OR "cognition therapeutic"[All Fields] OR "cognition therapeutics"[All Fields] OR "cognition therapist"[All Fields] OR "cognition therapists"[All Fields] OR "cognition treatment"[All Fields] OR "cognition treatments"[All Fields] OR psychodynamic[All Fields] OR Psychoanalysis[MH] OR psychoanalysis[All Fields] OR psychoanalytic\*[All Fields] OR counselling[All Fields] OR counseling[All Fields] OR Counseling[MH] OR "problem-solving"[All Fields] OR mindfulness[All Fields] OR (acceptance[All Fields] AND commitment[All Fields] ) OR "assertiveness training"[All Fields] OR "behavior activation"[All Fields] OR "behaviors activation"[All Fields] OR "behavioral activation"[All Fields] OR "cognitive therapies"[All Fields] OR "cognitive therapy"[All Fields] OR "cognitive therapeutic"[All Fields] OR "cognitive therapeutics"[All Fields] OR "cognitive therapeutical"[All Fields] OR "cognitive therapist"[All Fields] OR "cognitive therapists"[All Fields] OR "cognitive treatment"[All Fields] OR "cognitive treatments"[All Fields] OR "cognitive restructuring"[All Fields] OR ("compassion-focused"[All Fields] OR "compassion-focussed"[All Fields]) AND (therapy[SH] OR therapies[All Fields] OR therapy[All Fields] OR therape\*[All Fields] OR therapis\*[All Fields] OR Therapeutics [OR treatment\*[All Fields]]) OR ((therapy[SH] OR therapies[All Fields] OR therapy [All Fields] OR therape\*[All Fields] OR therapis\*[All Fields] OR Therapeutics[MH] OR treatment\*[All Fields]) AND constructivist\*[All Fields]) OR "metacognitive therapies"[All Fields] OR "metacognitive therapy"[All Fields] OR "metacognitive therapeutic"[All Fields] OR "metacognitive therapeutics"[All Fields] OR "metacognitive therapeutical"[All Fields] OR "metacognitive therapist"[All Fields] OR "metacognitive therapists"[All Fields] OR "metacognitive treatment"[All Fields] OR "metacognitive treatments"[All Fields] OR "meta-cognitive therapies"[All Fields] OR "meta-cognitive therapy"[All Fields] OR "meta-cognitive therapeutic"[All Fields] OR "meta-cognitive therapeutics"[All Fields] OR "meta-cognitive therapeutical"[All Fields] OR "meta-cognitive therapist"[All Fields] OR "meta-cognitive therapists"[All Fields] OR "meta-cognitive treatment"[All Fields] OR "meta-cognitive

treatments"[All Fields] OR "solution-focused therapies"[All Fields] OR "solution-focused therapy"[All Fields] OR "solution-focused therapeutic"[All Fields] OR "solution-focused therapeutics"[All Fields] OR "solution-focused therapeutical"[All Fields] OR "solution focused therapies"[All Fields] OR "solution focused therapy"[All Fields] OR "solution focused therapeutic"[All Fields] OR "solution focused therapeutics"[All Fields] OR "solution focused therapeutical"[All Fields]OR "solution-focussed therapies"[All Fields] OR "solution-focussed therapy"[All Fields] OR "solution-focussed therapeutics"[All Fields] OR "solution-focussed therapeutical"[All Fields]OR "solution focussed therapies"[All Fields] OR "solution focussed therapy"[All Fields] OR "solution focussed therapeutic"[All Fields] OR "solution focussed therapeutics"[All Fields] OR "solution focussed therapeutical"[All Fields] OR "self-control therapies"[All Fields] OR "self-control therapy"[All Fields] OR "self-control therapeutics"[All Fields] OR "self-control therapeutical"[All Fields] OR "self-control therapeutic"[All Fields] OR "self-control training"[All Fields] OR "self-control trainings"[All Fields] OR "self control therapies"[All Fields] OR "self control therapy"[All Fields] OR "self control therapeutics"[All Fields] OR "self control therapeutical"[All Fields] OR "self control therapeutic"[All Fields] OR "self control training"[All Fields] OR "self control trainings"[All Fields] AND (Depressive Disorder[MH] OR Depression[MH]OR dysthymi\*[All Fields] OR "affective disorder"[All Fields]OR "affective disorders"[All Fields] OR "mood disorder"[All Fields] OR "mood disorders"[All Fields] OR depression\*[All Fields] OR depressive\*[All Fields] OR "dysthymic disorder"[MeSH Terms]) AND ((randomized controlled trial [pt] OR controlled clinical trial [pt] OR randomized [tiab] OR randomly [tiab] NOT (animals[mh] NOT (animals[mh] AND humans [mh])))

**eAppendix B. PRISMA Flowchart**

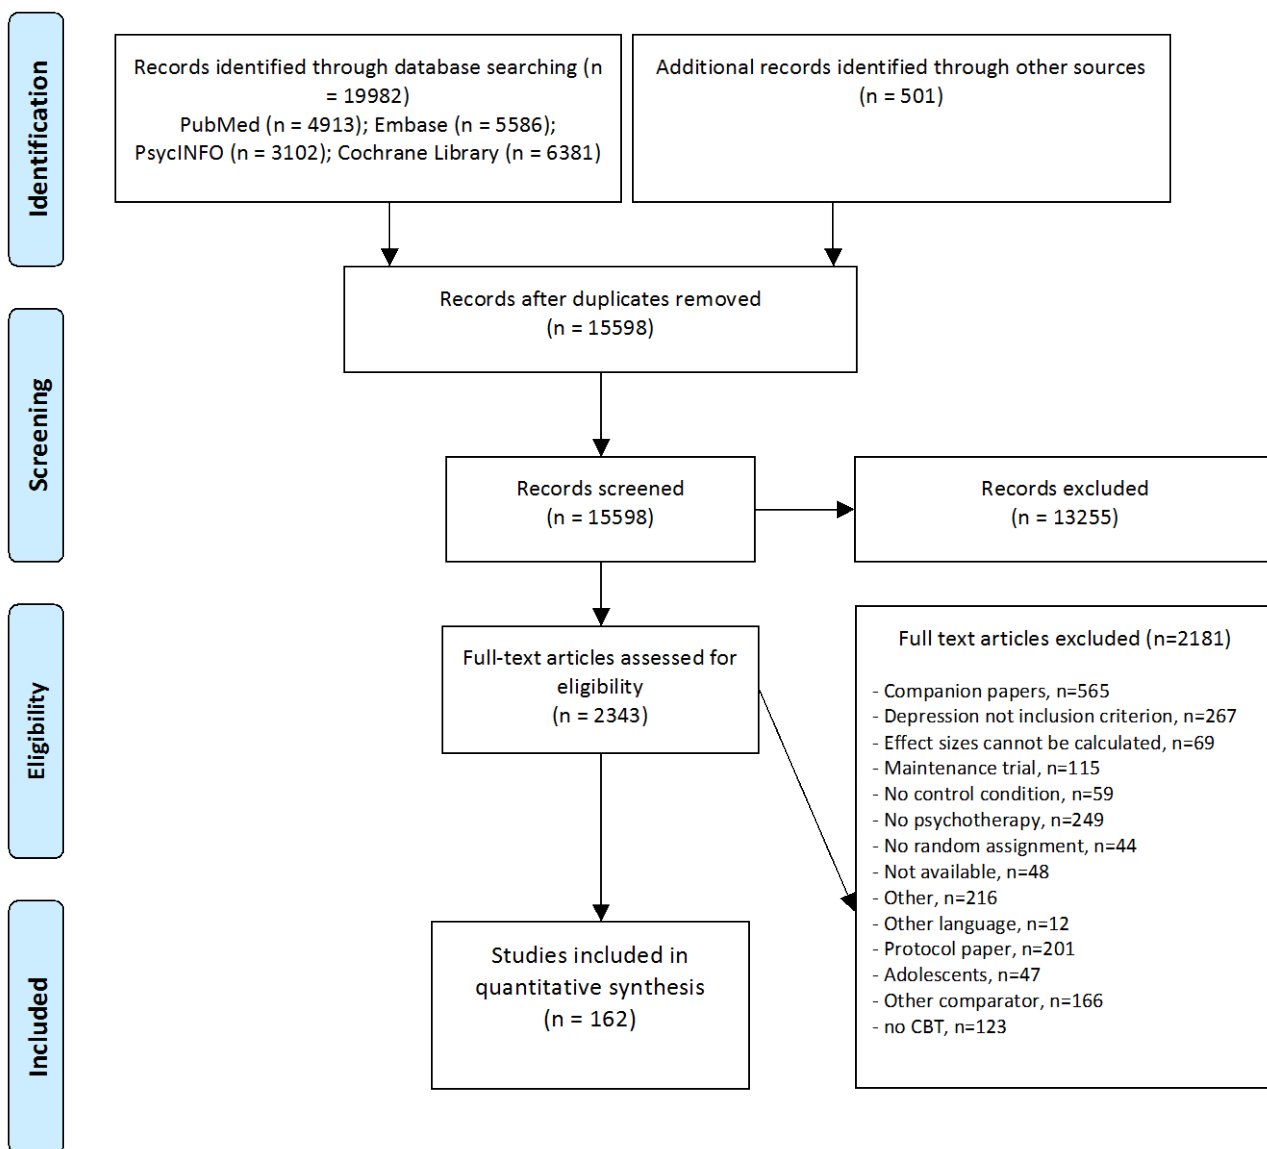

**Appendix C. Table With Selected Characteristics of Included Studies**

| <i>Study</i>         | <i>t1 [t3]</i> | <i>n1 [n3]</i> | <i>t2 [t4]</i> | <i>n2 [n4]</i> | <i>Recr</i> | <i>Target group</i> | <i>Diag-nosis</i> | <i>Wes-tern</i> | <i>RoB <sup>a)</sup></i> |
|----------------------|----------------|----------------|----------------|----------------|-------------|---------------------|-------------------|-----------------|--------------------------|
| Aagaard, 2017        | Grp            | 40             | CAU            | 35             | Clin        | Adults              | Mood              | West.           | ++ SR -                  |
| Allart,2003          | Grp            | 61             | CAU            | 41             | Comm        | Adults              | Self-rep          | West.           | -- SR +                  |
| Ammerman, 2013       | Ind            | 47             | CAU            | 46             | Other       | Other               | MDD               | West.           | -- ++                    |
| Andersson, 2013      | Grp            | 33             | GSH            | 32             | Comm        | Adults              | Mood              | West.           | ++ - +                   |
| Ayen, 2004           | Grp            | 11             | WL             | 10             | Comm        | Other               | Mood              | West.           | -- SR -                  |
| Beach, 1992          | Ind            | 15             | WL             | 15             | Comm        | Adults              | Mood              | West.           | -- SR -                  |
| Beevers, 2017        | USH            | 285            | WL             | 91             | Comm        | Adults              | Self-rep          | West.           | ++ - +                   |
| Berger, 2011         | GSH            | 25             | USH            | 25             | Comm        | Adults              | MDD               | West.           | ++ SR +                  |
|                      | WL             | 26             |                |                |             |                     |                   |                 |                          |
| Bowman, 1995         | GSH            | 10             | WL             | 10             | Comm        | Adults              | Self-rep          | West.           | ----                     |
| Brown, 1984          | Ind            | 13             | Grp            | 25             | Comm        | Adults              | Mood              | West.           | -- SR -                  |
|                      | GSH            | 14             | WL             | 11             |             |                     |                   |                 |                          |
| Buhrman, 2015        | GSH            | 24             | WL             | 28             | Comm        | Gen med             | Self-rep          | West.           | ++ SR +                  |
| Burns, 2013          | Ind            | 16             | CAU            | 13             | Other       | Other               | Self-rep          | West.           | ++ SR +                  |
| Carta, 2012          | Ind            | 34             | CAU            | 30             | Clin        | Adults              | Self-rep          | West.           | -- SR -                  |
| Carr, 2017           | Grp            | 40             | CAU            | 42             | Clin        | Adults              | MDD               | West.           | -- ++                    |
| Casanas, 2012        | Grp            | 119            | CAU            | 112            | Clin        | Adults              | MDD               | West.           | ++ SR +                  |
| Castonguay, 2004     | Ind            | 11             | WL             | 10             | Comm        | Adults              | MDD               | West.           | -- +-                    |
| Chan, 2012           | Ind            | 17             | WL             | 16             | Clin        | Adults              | MDD               | NW              | - +- -                   |
| Chiang, 2015         | Grp            | 30             | CAU            | 32             | Clin        | Adults              | Mood              | NW              | ++ +-                    |
| Cho, 2008            | Ind            | 12             | CAU            | 10             | Other       | PPD                 | Mood              | NW              | -- SR -                  |
| Choi, 2012           | GSH            | 32             | WL             | 31             | Comm        | Other               | MDD               | West.           | ++ SR -                  |
| Clarke, 2002         | USH            | 112            | CAU            | 124            | Comm        | Adults              | Self-rep          | West.           | ++ SR +                  |
| Clarke, 2005         | USH            | 64             | CAU            | 69             | Comm        | Adults              | Self-rep          | West.           | ++ SR +                  |
| Clarke, 2009         | USH            | 35             | CAU            | 37             | Comm        | Adults              | Self-rep          | West.           | ++ SR +                  |
| Cooper, 2003         | Ind            | 42             | CAU            | 50             | Other       | PPD                 | MDD               | West.           | ++ SR +                  |
| Cooper, 2011         | GSH            | 9              | CAU            | 12             | Other       | Gen med             | Self-rep          | West.           | ++++                     |
| Cramer, 2011         | Grp            | 48             | CAU            | 19             | Comm        | Other               | Self-rep          | West.           | + - SR +                 |
| De Graaf, 2009       | USH            | 100            | CAU            | 103            | Comm        | Adults              | Self-rep          | West.           | ++ SR +                  |
| Dekker, 2012         | Ind            | 20             | CAU            | 21             | Other       | Gen med             | Self-rep          | West.           | ++ SR +                  |
| Desautels, 2017      | Ind            | 25             | WL             | 11             | Other       | Gen med             | Self-rep          | West.           | ++++                     |
| Dobkin, 2011         | Ind            | 41             | CAU            | 39             | Comm        | Gen med             | Mood              | West.           | + - ++                   |
| Dowrick, 2000        | Grp            | 80             | CAU            | 139            | Other       | Adults              | Mood              | West.           | ++ SR +                  |
| Duarte, 2009         | Grp            | 41             | CAU            | 44             | Other       | Gen med             | MDD               | NW              | ++ SR +                  |
| Dwight-Johnson, 2011 | Tel            | 50             | CAU            | 51             | Other       | Other               | Self-rep          | West.           | + - ++                   |
| Elkin, 1990          | Ind            | 59             | Pla            | 62             | Clin        | Adults              | MDD               | West.           | ++++                     |

|                    |     |     |     |     |       |         |          |       |          |
|--------------------|-----|-----|-----|-----|-------|---------|----------|-------|----------|
| Embling, 2002      | Grp | 19  | WL  | 19  | Clin  | Adults  | MDD      | West. | -----    |
| Euteneuer, 2017    | Ind | 34  | WL  | 30  | Comm  | Adults  | MDD      | West. | + - SR + |
| Fann, 2015         | Ind | 18  | Tel | 40  | Comm  | Gen med | MDD      | West. | + - + -  |
|                    | CAU | 42  |     |     |       |         |          |       |          |
| Famarzi, 2008      | Grp | 29  | CAU | 30  | Other | Other   | MDD      | NW    | -- SR -  |
| Farrer, 2011       | GSH | 18  | USH | 27  | Other | Adults  | Self-rep | West. | + + SR + |
|                    | CAU | 27  |     |     |       |         |          |       |          |
| Fischer, 2015      | GSH | 45  | WL  | 45  | Other | Gen med | Self-rep | West. | + + + +  |
| Floyd, 2004        | Ind | 8   | GSH | 13  | Comm  | Elderly | Mood     | West. | -----    |
|                    | WL  | 14  |     |     |       |         |          |       |          |
| Forand 2017        | GSH | 59  | WL  | 30  | Comm  | Adults  | Self-rep | West. | --- +    |
| Forsell, 2017      | GSH | 22  | WL  | 20  | Comm  | PPD     | MDD      | West. | + + SR + |
| Freedland, 2009    | Ind | 41  | CAU | 40  | Other | Gen med | Mood     | West. | + + + +  |
| Freedland 2015     | Ind | 79  | CAU | 79  | Other | Gen med | MDD      | West. | - + + +  |
| Furukawa, 2012     | Tel | 58  | WL  | 60  | Other | Other   | Self-rep | NW    | + + SR + |
| Garnefski, 2011    | USH | 15  | WL  | 17  | Comm  | Gen med | Self-rep | West. | + - SR - |
| Geraedts, 2014     | GSH | 116 | CAU | 115 | Other | Adults  | Self-rep | West. | + + SR + |
| Gilbody 2016 - BtB | USH | 210 | CAU | 239 | Clin  | Adults  | Self-rep | West. | + + SR + |
| Gilbody 2016 - MG  | USH | 242 | CAU | 239 | Clin  | Adults  | Self-rep | West. | + + SR + |
| Gilbody, 2017      | GSH | 141 | USH | 128 | Comm  | Adults  | Self-rep | West. | + + SR + |
| Glueckauff, 2012   | Ind | 5   | Tel | 6   | Comm  | Other   | Self-rep | West. | -- SR -  |
| Hallgren, 2015     | GSH | 259 | CAU | 232 | Clin  | Adults  | Self-rep | West. | + + + -  |
| Hamamci, 2006      | Grp | 10  | CAU | 11  | Comm  | Adults  | Self-rep | West. | -- SR -  |
| Hamdan, 2009       | Grp | 44  | CAU | 36  | Comm  | Adults  | Self-rep | NW    | + + SR - |
| Haringsma, 2005    | Grp | 52  | WL  | 58  | Comm  | Elderly | Self-rep | West. | -- SR +  |
| Hassiotis, 2013    | Ind | 15  | CAU | 15  | Other | Other   | Mood     | West. | - + SR + |
| Hautzinger, 2004   | Grp | 55  | WL  | 30  | Comm  | Elderly | Mood     | West. | + - SR + |
| Himelhoch, 2013    | Ind | 18  | Tel | 16  | Other | Gen Med | MDD      | West. | - + + +  |
| Hobfoll, 2016      | GSH | 209 | WL  | 94  | Other | Other   | Self-rep | West. | + - SR + |
| Honey, 2002        | Grp | 22  | CAU | 22  | Other | PPD     | Self-rep | West. | -- SR +  |
| Horrell, 2014      | Grp | 180 | WL  | 202 | Comm  | Adults  | Self-rep | West. | + + SR + |
| Huang, 2015        | Grp | 31  | CAU | 30  | Other | Gen med | Self-rep | NW    | -- SR -  |
| Husain, 2017       | Grp | 112 | CAU | 104 | Other | Other   | Mood     | NW    | + + SR + |
| Jamison, 1995      | GSH | 33  | WL  | 39  | Comm  | Adults  | MDD      | West. | -----    |
| Jarett, 1999       | Ind | 36  | Pla | 36  | Comm  | Adults  | MDD      | West. | + + + +  |
| Joling, 2011       | GSH | 86  | CAU | 84  | Other | Elderly | Self-rep | West. | + + SR + |
| Kamga, 2017        | GSH | 35  | WL  | 35  | Other | Gen med | Self-rep | West. | + + SR + |
| Kessler, 2009      | GSH | 113 | WL  | 97  | Clin  | Adults  | Mood     | West. | + + SR + |
| King, 2000         | Ind | 63  | CAU | 67  | Clin  | Adults  | Self-rep | West. | + + SR + |
| Laidlaw, 2008      | Ind | 20  | CAU | 20  | Clin  | Elderly | MDD      | West. | + + + -  |

|                   |     |     |     |     |       |         |          |       |          |
|-------------------|-----|-----|-----|-----|-------|---------|----------|-------|----------|
| Lamers, 2010      | Ind | 111 | CAU | 125 | Other | Gen med | Mood     | West. | ++ SR +  |
| Landreville, 1997 | GSH | 10  | WL  | 13  | Comm  | Elderly | Self-rep | West. | -- SR -  |
| Larcombe, 1984    | Grp | 9   | WL  | 10  | Other | Gen med | Mood     | West. | --- + -  |
| Lerner, 2015      | Tel | 190 | CAU | 190 | Other | Other   | Mood     | West. | + - SR + |
| Leung, 2013       | Grp | 47  | CAU | 50  | Other | PPD     | Self-rep | NW    | -- SR +  |
| Levin, 2011       | USH | 99  | CAU | 91  | Clin  | Adults  | Self-rep | West. | ++ SR +  |
| Lintvedt, 2013    | USH | 81  | WL  | 82  | Other | Adults  | Self-rep | West. | ++ SR +  |
| Liu, 2009         | GSH | 27  | WL  | 25  | Comm  | Adults  | Self-rep | NW    | -- SR +  |
| Lovell, 2008      | Ind | 19  | CAU | 23  | Clin  | Adults  | Self-rep | West. | - + SR + |
| Malouff, 1988     | Grp | 14  | WL  | 14  | Comm  | Other   | Self-rep | West. | -- SR -  |
| Martin, 2015      | Ind | 18  | CAU | 26  | Comm  | Gen med | MDD      | West. | ++ SR -  |
| McCusker, 2015    | GSH | 98  | USH | 91  | Clin  | Gen med | Self-rep | West. | ++ SR +  |
| McKee, 2006       | Ind | 21  | CAU | 20  | Other | PPD     | Self-rep | West. | -- SR -  |
| Meyer, 2009       | USH | 159 | WL  | 57  | Comm  | Adults  | Self-rep | West. | ++ SR +  |
| Meyer, 2015       | USH | 60  | WL  | 72  | Comm  | Adults  | Self-rep | West. | ++ SR +  |
| Milgrom, 2015     | Ind | 27  | CAU | 27  | Comm  | PPD     | Mood     | West. | ++ SR +  |
| Milgrom, 2016     | GSH | 21  | CAU | 22  | Comm  | PPD     | Mood     | West. | ++ SR +  |
| Mohr, 2000        | Tel | 16  | CAU | 16  | Other | Gen med | Self-rep | West. | -- SR +  |
| Mohr, 2011        | Tel | 40  | CAU | 41  | Clin  | Adults  | MDD      | West. | --- + +  |
| Mohr, 2012        | Ind | 141 | Tel | 152 | Clin  | Adults  | MDD      | West. | +++ + +  |
| Mohr, 2013        | GSH | 34  | USH | 35  | Comm  | Adults  | MDD      | West. | ++ SR +  |
|                   | WL  | 33  |     |     |       |         |          |       |          |
| Moldovan, 2013    | GSH | 21  | WL  | 22  | Other | Adults  | Self-rep | West. | ++ SR +  |
| Moritz, 2012      | USH | 80  | WL  | 90  | Comm  | Adults  | Self-rep | West. | -- SR +  |
| Mukhtar, 2011     | Grp | 58  | WL  | 55  | Other | Adults  | Mood     | NW    | -- SR -  |
| Naeem, 2013       | GSH | 94  | CAU | 89  | Clin  | Adults  | Mood     | NW    | ++ SR +  |
| Naeem, 2015       | Ind | 69  | CAU | 68  | Clin  | Adults  | Mood     | NW    | ++ SR +  |
| Naylor, 2010      | USH | 15  | CAU | 18  | Clin  | Adults  | Self-rep | West. | + - SR - |
| Newby 2017        | GSH | 41  | WL  | 49  | Comm  | Gen med | MDD      | West. | ++ SR +  |
| O'Mahen, 2013     | Ind | 21  | CAU | 23  | Other | PPD     | MDD      | West. | ++ SR +  |
| O'Neill, 2014     | Tel | 61  | CAU | 60  | Other | Gen med | Self-rep | West. | ++ SR +  |
| Omidi, 2013       | Grp | 30  | CAU | 30  | Clin  | Adults  | MDD      | NW    | -- SR -  |
| Pace, 1993        | Ind | 31  | WL  | 43  | Other | Adults  | Self-rep | West. | -- SR -  |
| Pecheur, 1984     | Ind | 7   | WL  | 7   | Comm  | Adults  | MDD      | West. | --- + -  |
| Penckofer, 2012   | Grp | 29  | CAU | 36  | Comm  | Gen med | Self-rep | West. | + - SR + |
| Perini, 2009      | GSH | 27  | WL  | 17  | Comm  | Adults  | MDD      | West. | + - SR + |
| Pibernik, 2009    | Grp | 25  | CAU | 25  | Other | Gen med | Self-rep | West. | - + SR - |
| Power, 2012       | Ind | 22  | CAU | 10  | Clin  | Adults  | Mood     | West. | -- SR +  |
| Propst, 1992      | Ind | 10  | CAU | 11  | Comm  | Adults  | Self-rep | West. | --- + -  |
| Pugh, 2014        | GSH | 19  | WL  | 21  | Comm  | PPD     | Self-rep | West. | ++ SR -  |



|                      |     |     |     |     |       |         |          |       |          |
|----------------------|-----|-----|-----|-----|-------|---------|----------|-------|----------|
| Qiu, 2013            | Grp | 31  | WL  | 31  | Other | Gen med | MDD      | NW    | ++++     |
| Richards, 2015       | GSH | 96  | WL  | 92  | Comm  | Adults  | Self-rep | West. | -+SR+    |
| Roepke, 2015         | USH | 20  | WL  | 36  | Comm  | Adults  | Self-rep | West. | ++SR+    |
| Rohan, 2007          | Grp | 15  | WL  | 15  | Comm  | Adults  | MDD      | West. | ++++     |
| Rush, 1981           | Ind | 8   | Grp | 23  | Comm  | Adults  | MDD      | West. | --SR+    |
| Ruwaard, 2009        | GSH | 36  | WL  | 18  | Comm  | Adults  | Self-rep | West. | + - SR + |
| Safren, 2009         | Ind | 23  | CAU | 22  | Comm  | Gen med | Mood     | West. | --++     |
| Safren, 2016         | Ind | 94  | CAU | 49  | Comm  | Gen med | Mood     | West. | + - ++   |
| Saloheimo, 2016      | Grp | 38  | CAU | 34  | Clin  | Adults  | MDD      | West. | +++ -    |
| Savard, 2006         | Ind | 21  | WL  | 16  | Comm  | Gen med | Self-rep | West. | +++ -    |
| Schmidt, 1983        | Ind | 12  | Grp | 11  | Comm  | Adults  | Self-rep | West. | --SR -   |
|                      | GSH | 12  | WL  | 10  |       |         |          |       |          |
| Schroder, 2014       | USH | 25  | WL  | 32  | Other | Gen med | Self-rep | West. | ++SR+    |
| Scogin, 1987         | GSH | 9   | WL  | 8   | Comm  | Elderly | Self-rep | West. | ----     |
| Scogin, 1989         | GSH | 21  | WL  | 21  | Comm  | Elderly | Self-rep | West. | ----     |
| Scott, 1990          | Ind | 27  | Grp | 17  | Clin  | Adults  | Mood     | West. | ++SR+    |
|                      | WL  | 23  |     |     |       |         |          |       |          |
| Scott, 1992          | Ind | 29  | CAU | 29  | Clin  | Adults  | MDD      | West. | ++++     |
| Scott, 1997          | Ind | 18  | CAU | 16  | Clin  | Adults  | MDD      | West. | --+-     |
| Selmi, 1990          | Ind | 12  | GSH | 12  | Comm  | Adults  | Mood     | West. | --++     |
|                      | WL  | 12  |     |     |       |         |          |       |          |
| Serfaty, 2009        | Ind | 64  | CAU | 55  | Clin  | Elderly | Mood     | West. | ++SR+    |
| Sheeber, 2012        | GSH | 35  | WL  | 35  | Other | PPD     | Self-rep | West. | ++SR+    |
| Simoni, 2013         | Ind | 20  | CAU | 20  | Other | Gen med | Self-rep | West. | ++SR+    |
| Sinniah, 2017        | Ind | 28  | CAU | 14  | Clin  | Adults  | Mood     | NW    | --SR -   |
| Spek, 2007           | Grp | 99  | USH | 102 | Comm  | Elderly | Self-rep | West. | ++SR+    |
|                      | WL  | 100 |     |     |       |         |          |       |          |
| Strauss, 2012        | Grp | 14  | CAU | 14  | Clin  | Adults  | MDD      | West. | --SR+    |
| Taylor, 1977         | Ind | 7   | WL  | 7   | Comm  | Adults  | Self-rep | West. | --SR -   |
| Taylor, 2009         | Ind | 19  | WL  | 22  | Other | Gen med | Self-rep | West. | --++     |
| Teichman, 1995       | Ind | 15  | WL  | 15  | Clin  | Adults  | Mood     | NW    | --SR -   |
| Teri, 1986           | Ind | 19  | Grp | 47  | Comm  | Adults  | Mood     | West. | --SR -   |
| Titov, 2010          | GSH | 46  | WL  | 40  | Comm  | Adults  | MDD      | West. | ++SR+    |
| Titov, 2015          | GSH | 27  | WL  | 25  | Comm  | Elderly | Self-rep | West. | ++SR+    |
| Tomasino, 2017       | GSH | 9   | WL  | 12  | Comm  | Elderly | Self-rep | West. | --SR+    |
| Tovote, 2014         | Ind | 32  | WL  | 31  | Other | Gen med | Self-rep | West. | + - - +  |
| Verduyn, 2003        | Grp | 32  | CAU | 12  | Other | Other   | Self-rep | West. | +++ -    |
| Vernmark, 2010 - em. | GSH | 29  | WL  | 27  | Comm  | Adults  | MDD      | West. | ++SR+    |
| Vernmark, 2010 - sh  | GSH | 29  | WL  | 27  | Comm  | Adults  | MDD      | West. | ++SR+    |
| Wagner, 2014         | Grp | 28  | GSH | 25  | Comm  | Adults  | Self-rep | West. | + - SR + |

|                      |     |     |     |     |      |         |          |       |         |
|----------------------|-----|-----|-----|-----|------|---------|----------|-------|---------|
| Warmerdam,2008       | GSH | 88  | WL  | 87  | Comm | Adults  | Self-rep | West. | ++ SR + |
| Wierzbicki, 1987     | Ind | 9   | Grp | 9   | Comm | Adults  | Mood     | West. | -- SR - |
| Williams, 2013 (aus) | GSH | 26  | WL  | 27  | Comm | Adults  | Mood     | West. | ++ SR + |
| Williams, 2013 (uk)  | GSH | 101 | CAU | 102 | Clin | Adults  | Self-rep | West. | -+ SR + |
| Wilson, 1983         | Ind | 8   | WL  | 9   | Comm | Adults  | Self-rep | West. | ----    |
| Wollersheim 1991     | Grp | 8   | GSH | 8   | Comm | Adults  | MDD      | West. | -- SR - |
|                      | WL  | 8   |     |     |      |         |          |       |         |
| Wong I, 2008         | Grp | 48  | WL  | 40  | Comm | Adults  | MDD      | NW    | -+ SR + |
| Wong II, 2008        | Grp | 163 | WL  | 159 | Comm | Adults  | MDD      | NW    | -+ SR - |
| Wuthrich, 2013       | Grp | 27  | WL  | 35  | Comm | Elderly | Mood     | West. | + - + + |
| Zettle, 1992         | Ind | 13  | Grp | 14  | Comm | Adults  | Self-rep | West. | -- + -  |
| Zu, 2014             | Ind | 12  | CAU | 16  | Clin | Adults  | MDD      | NW    | + - + - |

Abbreviations:

CAU: care-as-usual; Clin: clinical recruitment; Comm: community recruitment; Gen med: patient with comorbid general medical disorder; Grp: group format; GSH: guided self-help; Ind: individual format; MDD: major depressive disorder; Mood: mood disorder; n1-4: n of condition 1 to 4; NW: non-Western country; Other: other (recruitment or target group); Pla: placebo; PPD: postpartum depression; recr: recruitment; RoB: risk of bias; Self-rep: self-report; t1-4: condition 1 to 4; Tel: telephone format; USH: unguided self-help; West: Western country; WL: waiting list.

## eAppendix D. References of Included Studies

| Study            |                                                                                                                                                                                                                                                                                                                                         |
|------------------|-----------------------------------------------------------------------------------------------------------------------------------------------------------------------------------------------------------------------------------------------------------------------------------------------------------------------------------------|
| Aagaard, 2017    | Aagaard, J., Foldager, L., Makki, A., Hansen, V., & Møller-Nielsen, K. (2017). The efficacy of psychoeducation on recurrent depression: a randomized trial with a 2-year follow-up. <i>Nord J Psychiatry</i> , 71(3), 223-229.                                                                                                          |
| Allart, 2003     | Allart-Van Dam, E., Hosman, C. M. H., Hoogduin, C. A. L., & Schaap, C. P. D. R. (2003). The coping with depression course: Short-term outcomes and mediating effects of a randomized controlled trial in the treatment of subclinical depression. <i>Behavior Therapy</i> , 34(3), 381-396. doi:10.1016/S0005-7894(03)80007-2           |
| Ammerman, 2013   | Ammerman, R. T., Putnam, F. W., Altaye, M., Stevens, J., Teeters, A. R., & Van Ginkel, J. B. (2013). A clinical trial of in-home CBT for depressed mothers in home visitation. <i>Behavior Therapy</i> , 44(3), 359-372. doi:10.1016/j.beth.2013.01.002                                                                                 |
| Andersson, 2013  | Andersson G, Hesser H, Veilord A, Svedling L, Andersson F, Sleman O, et al. Randomised controlled non-inferiority trial with 3-year follow-up of internet-delivered versus face-to-face group cognitive behavioural therapy for depression. <i>Journal of Affective Disorders</i> . 2013;151(3):986-94.                                 |
| Ayen, 2004       | Ayen, I., & Hautzinger, M. (2004). Cognitive behavior therapy for depression in menopausal women. A controlled, randomized treatment study. <i>Zeitschrift für Klinische Psychologie und Psychotherapie</i> , 33(4), 290-299.                                                                                                           |
| Beach, 1992      | Beach, S. R., & O'Leary, K. D. (1992). Treating depression in the context of marital discord: Outcome and predictors of response of marital therapy versus cognitive therapy. <i>Behavior Therapy</i> , 23(4), 507-528. doi:10.1016/S0005-7894(05)80219-9                                                                               |
| Beevers, 2017    | Beevers, C., Pearson, R., Hoffman, J., Foulser, A., Shumake, J., & Meyer, B. (2017). Effectiveness of an internet intervention (Deprexis) for depression in a united states adult sample: a parallel-group pragmatic randomized controlled trial. <i>Journal of Consulting and Clinical Psychology</i> , 85(4), 367-380.                |
| Berger, 2011     | Berger, T., Hämmerli, K., Gubser, N., Andersson, G., & Caspar, F. (2011). Internet-based treatment of depression: A randomized controlled trial comparing guided with unguided self-help. <i>Cognitive Behaviour Therapy</i> , 40(4), 251-266. doi:10.1080/16506073.2011.616531                                                         |
| Bowman, 1995     | Bowman, D., Scogin, F., & Lyrene, B. (1995). The efficacy of self-examination therapy and cognitive bibliotherapy in the treatment of mild to moderate depression. <i>Psychotherapy Research</i> , 5(2), 131-140. doi:10.1080/10503309512331331256                                                                                      |
| Brown, 1984      | Brown, R. A., & Lewinsohn, P. M. (1984). A psychoeducational approach to the treatment of depression: Comparison of group, individual, and minimal contact procedures. <i>Journal of Consulting and Clinical Psychology</i> , 52(5), 774. doi:10.1037/0022-006X.52.5.774                                                                |
| Buhrman, 2015    | Buhrman, M., Syk, M., Burvall, O., Hartig, T., Gordh, T., & Andersson, G. (2015). Individualized guided internet-delivered cognitive-behavior therapy for chronic pain patients with comorbid depression and anxiety: A randomized controlled trial. <i>Clinical Journal of Pain</i> , 31(6), 504-516. doi:10.1097/AJP.0000000000000176 |
| Burns, 2013      | Burns, A., O'Mahen, H., Baxter, H., Bennert, K., Wiles, N., Ramchandani, P., . . . Evans, J. (2013). A pilot randomised controlled trial of cognitive behavioural therapy for antenatal depression. <i>BMC Psychiatry</i> , 13, 33. doi:10.1186/1471-244x-13-33                                                                         |
| Carr, 2016       | Carr, A., Finnegan, L., Griffin, E., Cotter, P., & Hyland, A. (2016). A randomized controlled trial of the Say Yes to Life (SYTL) positive psychology group psychotherapy program for depression: An interim report. <i>Journal of Contemporary Psychotherapy</i> , 47(3), 153-161. doi:10.1007/s10879-016-9343-6                       |
| Carta, 2017      | Carta MG, Petretto D, Adamo S, Bhat KM, Lecca ME, Mura G, et al. Counseling in primary care improves depression and quality of life. <i>Clinical Practice and Epidemiology in Mental Health</i> . 2012;8.                                                                                                                               |
| Casanas, 2012    | Casanas, R., Catalan, R., del Val, J. L., Real, J., Valero, S., & Casas, M. (2012). Effectiveness of a psycho-educational group program for major depression in primary care: A randomized controlled trial. <i>BMC Psychiatry</i> , 12, 230. doi:10.1186/1471-244x-12-230                                                              |
| Castonguay, 2004 | Castonguay, L. G., Schut, A. J., Aikens, D. E., Constantino, M. J., Laurenceau, J.-P., Bologh, L., & Burns, D. D. (2004). Integrative cognitive therapy for depression: A preliminary investigation. <i>Journal of Psychotherapy Integration</i> , 14(1), 4-20. doi:10.1037/1053-0479.14.1.4                                            |
| Chan, 2012       | Chan, A. S., Wong, Q. Y., Sze, S. L., Kwong, P. P., Han, Y. M., & Cheung, M. C. (2012). A Chinese Chan-based mind-body intervention for patients with depression. <i>Journal of Affective Disorders</i> , 142(1-3), 283-289. doi:10.1016/j.jad.2012.05.018                                                                              |

|                      |                                                                                                                                                                                                                                                                                                                                                              |
|----------------------|--------------------------------------------------------------------------------------------------------------------------------------------------------------------------------------------------------------------------------------------------------------------------------------------------------------------------------------------------------------|
| Chiang, 2015         | Chiang, K. J., Chen, T. H., Hsieh, H. T., Tsai, J. C., Ou, K. L., & Chou, K. R. (2015). One-year follow-up of the effectiveness of cognitive behavioral group therapy for patients' depression: A randomized, single-blinded, controlled study. <i>Scientific World Journal</i> , 2015, Article ID 373149. doi:10.1155/2015/373149                           |
| Cho, 2008            | Cho, H. J., Kwon, J. H., & Lee, J. J. (2008). Antenatal cognitive-behavioral therapy for prevention of postpartum depression: A pilot study. <i>Yonsei Med J</i> , 49(4), 553-562. doi:10.3349/ymj.2008.49.4.553                                                                                                                                             |
| Choi, 2012           | Choi, I., Zou, J., Titov, N., Dear, B. F., Li, S., Johnston, L., . . . Hunt, C. (2012). Culturally attuned Internet treatment for depression amongst Chinese Australians: A randomised controlled trial. <i>Journal of Affective Disorders</i> , 136(3), 459-468. doi:10.1016/j.jad.2011.11.003                                                              |
| Clarke, 2002         | Clarke G, Reid E, Eubanks D, et al. Overcoming depression on the Internet (ODIN): a randomized controlled trial of an Internet depression skills intervention program. <i>J Med Internet Res</i> . 2002;4 (3):E14.                                                                                                                                           |
| Clarke, 2005         | Clarke G, Eubanks D, Reid E, et al. Overcoming Depression on the Internet (ODIN) (2): a randomized trial of a self-help depression skills program with reminders. <i>J Med Internet Res</i> . 2005; 7(2):e16.                                                                                                                                                |
| Clarke, 2009         | Clarke G, Kelleher C, Hornbrook M, Debar L, Dickerson J, Gullion C. Randomized effectiveness trial of an Internet, pure self-help, cognitive behavioral intervention for depressive symptoms in young adults. <i>Cogn Behav Ther</i> . 2009;38(4):222-234.                                                                                                   |
| Cooper, 2003         | Cooper, P. J., Murray, L., Wilson, A., & Romaniuk, H. (2003). Controlled trial of the short- and long-term effect of psychological treatment of post-partum depression. I. Impact on maternal mood. <i>The British Journal of Psychiatry</i> , 182(5), 412-419. doi:10.1192/bjp.182.5.412                                                                    |
| Cooper, 2011         | Cooper CL, Hind D, Parry GD, Isaac CL, Dimairo M, O'Cathain A, et al. Computerised cognitive behavioural therapy for the treatment of depression in people with multiple sclerosis: External pilot trial. <i>Trials</i> . 2011;12(1):259.                                                                                                                    |
| Cramer, 2011         | Cramer, H., Salisbury, C., Conrad, J., Eldred, J., & Araya, R. (2011). Group cognitive behavioural therapy for women with depression: Pilot and feasibility study for a randomised controlled trial using mixed methods. <i>BMC Psychiatry</i> , 11, 82. doi:10.1186/1471-244x-11-82                                                                         |
| De Graaf, 2009       | de Graaf LE, Gerhards SA, Arntz A, et al. Clinical effectiveness of online computerised cognitive-behavioural therapy without support for depression in primary care: randomised trial. <i>Br J Psychiatry</i> . 2009;195(1):73-80.                                                                                                                          |
| Dekker, 2012         | Dekker, R. L., Moser, D. K., Peden, A. R., & Lennie, T. A. (2012). Cognitive therapy improves three-month outcomes in hospitalized patients with heart failure. <i>J Card Fail</i> , 18(1), 10-20. doi:10.1016/j.cardfail.2011.09.008                                                                                                                        |
| Desautels, 2017      | Desautels, C., Savard, J., Ivers, H., Savard, M. H., & Caplette-Gingras, A. (2017). Treatment of Depressive Symptoms in Patients with Breast Cancer: A Randomized Controlled Trial Comparing Cognitive Therapy and Bright Light Therapy. <i>Health Psychology</i> .                                                                                          |
| Dobkin, 2011         | Dobkin, R. D., Menza, M., Allen, L. A., Gara, M. A., Mark, M. H., Tiu, J., . . . Friedman, J. (2011). Cognitive-behavioral therapy for depression in Parkinson's disease: A randomized, controlled trial. <i>American journal of psychiatry</i> , 168(10), 1066-1074. doi:10.1176/appi.ajp.2011.10111669                                                     |
| Dowrick, 2000        | Dowrick, C., Dunn, G., Ayuso-Mateos, J. L., Dalgard, O. S., Page, H., & Lehtinen, V. (2000). Problem solving treatment and group psychoeducation for depression: Multicentre randomised controlled trial Outcomes of Depression International Network [ODIN] Group. <i>Bmj</i> , 321(7274), 1450-1454. doi:10.1136/bmj.321.7274.1450                         |
| Duarte, 2009         | Duarte, P. S., Miyazaki, M. C., Blay, S. L., & Sesso, R. (2009). Cognitive-behavioral group therapy is an effective treatment for major depression in hemodialysis patients. <i>Kidney Int</i> , 76(4), 414-421. doi:10.1038/ki.2009.156                                                                                                                     |
| Dwight-Johnson, 2011 | Dwight-Johnson, M., Aisenberg, E., Golinelli, D., Hong, S., O'Brien, M., & Ludman, E. (2011). Telephone-based cognitive-behavioral therapy for Latino patients living in rural areas: A randomized pilot study. <i>Psychiatric Services</i> , 62(8), 936-942. doi:10.1176/appi.ps.62.8.936                                                                   |
| Elkin, 1990          | Elkin, I., Shea, M. T., Watkins, J. T., Imber, S. D., Sotsky, S. M., Collins, J. F., . . . et al. (1989). National institute of mental health treatment of depression collaborative research program. General effectiveness of treatments. <i>Archives of general psychiatry</i> , 46(11), 971-982; discussion 983. doi:10.1001/archpsyc.1989.01810110013002 |
| Embling, 2002        | Embling S. The effectiveness of cognitive behavioural therapy in depression. <i>Nursing Standard</i> . 2002;17(14-15):33-41.                                                                                                                                                                                                                                 |

|                    |                                                                                                                                                                                                                                                                                                                               |
|--------------------|-------------------------------------------------------------------------------------------------------------------------------------------------------------------------------------------------------------------------------------------------------------------------------------------------------------------------------|
| Euteneuer, 2017    | Euteneuer, F., Dannehl, K., Del Rey, A., Engler, H., Schedlowski, M., & Rief, W. (2017). Immunological effects of behavioral activation with exercise in major depression: An exploratory randomized controlled trial. <i>Translational Psychiatry</i> , 7(5).                                                                |
| Fann, 2015         | Fann, J. R., Bombardier, C. H., Vannoy, S., Dyer, J., Ludman, E., Dikmen, S., . . . Temkin, N. (2015). Telephone and in-person cognitive behavioral therapy for major depression after traumatic brain injury: A randomized controlled trial. <i>J Neurotrauma</i> , 32(1), 45-57. doi:10.1089/neu.2014.3423                  |
| Faramarzi, 2008    | Faramarzi, M., Alipor, A., Esmaelzadeh, S., Kheirkhah, F., Poladi, K., & Pash, H. (2008). Treatment of depression and anxiety in infertile women: Cognitive behavioral therapy versus fluoxetine. <i>Journal of Affective Disorders</i> , 108(1-2), 159-164. doi:10.1016/j.jad.2007.09.002                                    |
| Farrer, 2011       | Farrer L, Christensen H, Griffiths KM, Mackinnon A. Internet-based CBT for depression with and without telephone tracking in a national helpline: randomised controlled trial. <i>PLoS One</i> . 2011;6(11):e28099.                                                                                                           |
| Fischer, 2015      | Fischer A, Schröder J, Vettorazzi E, et al. An online programme to reduce depression in patients with multiple sclerosis: a randomised controlled trial. <i>Lancet Psychiatry</i> . 2015;2(3):217-223.                                                                                                                        |
| Floyd, 2004        | Floyd, M., Scogin, F., McKendree-Smith, N. L., Floyd, D. L., & Rokke, P. D. (2004). Cognitive therapy for depression: A comparison of individual psychotherapy and bibliotherapy for depressed older adults. <i>Behav Modif</i> , 28(2), 297-318. doi:10.1177/0145445503259284                                                |
| Forand 2017        | Forand, N., Barnett, J., Strunk, D., Hindiyeh, M., Feinberg, J., & Keefe, J. (2017). Efficacy of Guided iCBT for Depression and Mediation of Change by Cognitive Skill Acquisition. <i>Behavior Therapy</i> , (no pagination).                                                                                                |
| Forsell, 2017      | Forsell E, Bendix M, Holländare F, et al. Internet delivered cognitive behavior therapy for antenatal depression: A randomised controlled trial. <i>Journal of Affective Disorders</i> 2017; 221: 56-64.                                                                                                                      |
| Freedland, 2009    | Freedland, K. E., Skala, J. A., Carney, R. M., Rubin, E. H., Lustman, P. J., D-vila-Rom-n, V. G., . . . Hogue, C. W. (2009). Treatment of depression after coronary artery bypass surgery: A randomized controlled trial. <i>Archives of general psychiatry</i> , 66(4), 387-396. doi:10.1001/archgenpsychiatry.2009.7        |
| Freedland, 2015    | Freedland KE, Carney RM, Rich MW, Steinmeyer BC, Rubin EH. Cognitive behavior therapy for depression and self-care in heart failure patients: A randomized clinical trial. <i>JAMA Internal Medicine</i> . 2015;175(11):1773-82.                                                                                              |
| Furukawa, 2012     | Furukawa, T. A., Horikoshi, M., Kawakami, N., Kadota, M., Sasaki, M., Sekiya, Y., . . . Grothaus, L. C. (2012). Telephone cognitive-behavioral therapy for subthreshold depression and presenteeism in workplace: A randomized controlled trial. <i>PLoS ONE</i> , 7(4), e35330. doi:10.1371/journal.pone.0035330             |
| Garnefski, 2011    | Garnefski N, Kraaij V, Schroevers M. Effects of a cognitive behavioral self-help program on depressed mood for people with acquired chronic physical impairments: A pilot randomized controlled trial. <i>Patient education and counseling</i> . 2011;85(2):304-7.                                                            |
| Geraedts, 2014     | Geraedts, A. S., Kleiboer, A. M., Wiezer, N. M., van Mechelen, W., & Cuijpers, P. (2014). Short-term effects of a web-based guided self-help intervention for employees with depressive symptoms: Randomized controlled trial. <i>Journal of medical Internet research</i> , 16(5), e121. doi:10.2196/jmir.3185               |
| Gilbody 2016 - BtB | Gilbody S, Littlewood E, Hewitt C, et al; REEACT Team. Computerised cognitive behaviour therapy (cCBT) as treatment for depression in primary care (REEACT trial): large scale pragmatic randomised controlled trial. <i>BMJ</i> . 2015;351:h5627.                                                                            |
| Gilbody, 2017      | Gilbody, S., Brabyn, S., Lovell, K., Kessler, D., Devlin, T., Smith, L., . . . Worthy, G. (2017). Telephone-supported computerised cognitive-behavioural therapy: rEEACT-2 large-scale pragmatic randomised controlled trial. <i>British Journal of Psychiatry</i> , 210(5), 362-367.                                         |
| Glueckauf, 2012    | Glueckauf RL, Davis WS, Willis F, Sharma D, Gustafson DJ, Hayes J, et al. Telephone-based, cognitive-behavioral therapy for african american dementia caregivers with depression: Initial findings. <i>Rehabilitation Psychology</i> . 2012;57(2):124-39.                                                                     |
| Hallgren, 2015     | Hallgren, M., Kraepelien, M., Öjehagen, A., Lindfors, N., Zeebari, Z., Kaldo, V., & Forsell, Y. (2015). Physical exercise and internet-based cognitive-behavioural therapy in the treatment of depression: Randomised controlled trial. <i>British Journal of Psychiatry</i> , 207(3), 227-234. doi:10.1192/bjp.bp.114.160101 |
| Hamamci, 2006      | Hamamci, Z. (2006). Integrating psychodrama and cognitive behavioral therapy to treat moderate depression. <i>Arts in Psychotherapy</i> , 33(3), 199-207. doi:10.1016/j.aip.2006.02.001                                                                                                                                       |

|                  |                                                                                                                                                                                                                                                                                                                                                                                              |
|------------------|----------------------------------------------------------------------------------------------------------------------------------------------------------------------------------------------------------------------------------------------------------------------------------------------------------------------------------------------------------------------------------------------|
| Hamdan, 2009     | Hamdan-Mansour, A. M., Puskar, K., & Bandak, A. G. (2009). Effectiveness of cognitive-behavioral therapy on depressive symptomatology, stress and coping strategies among Jordanian university students. <i>Issues Ment Health Nurs</i> , 30(3), 188-196. doi:10.1080/01612840802694577                                                                                                      |
| Haringsma, 2005  | Haringsma, R., Engels, G., Cuijpers, P., & Spinhoven, P. (2006). Effectiveness of the Coping With Depression (CWD) course for older adults provided by the community-based mental health care system in the Netherlands: A randomized controlled field trial. <i>International Psychogeriatrics</i> , 18(02), 307-325. doi:10.1017/S104161020500253X                                         |
| Hassiotis, 2013  | Hassiotis, A., Serfaty, M., Azam, K., Strydom, A., Blizard, R., Romeo, R., . . . King, M. (2013). Manualised individual cognitive behavioural therapy for mood disorders in people with mild to moderate intellectual disability: A feasibility randomised controlled trial. <i>Journal of Affective Disorders</i> , 151(1), 186-195. doi:10.1016/j.jad.2013.05.076                          |
| Hautzinger, 2004 | Hautzinger, M., & Welz, S. (2004). Cognitive behavioral therapy for depressed older outpatients: A controlled, randomized trial. <i>Zeitschrift für Gerontologie und Geriatrie</i> , 37(6), 427-435. doi:10.1007/s00391-004-0262-x                                                                                                                                                           |
| Himelhoch, 2013  | Himelhoch S, Medoff D, Maxfield J, Dihmes S, Dixon L, Robinson C, et al. Telephone based cognitive behavioral therapy targeting major depression among urban dwelling, low income people living with HIV/AIDS: Results of a randomized controlled trial. <i>AIDS and behavior</i> . 2013;17(8):2756-64.                                                                                      |
| Hobfoll, 2016    | Hobfoll, S. E., Blais, R. K., Stevens, N. R., Walt, L., & Gengler, R. (2016). Vets prevail online intervention reduces PTSD and depression in veterans with mild-to-moderate symptoms. <i>Journal of Consulting and Clinical Psychology</i> , 84(1), 31-42. doi:10.1037/ccp0000041                                                                                                           |
| Honey, 2002      | Honey, K. L., Bennett, P., & Morgan, M. (2002). A brief psycho-educational group intervention for postnatal depression. <i>British Journal of Clinical Psychology</i> , 41(4), 405-409. doi:10.1348/014466502760387515                                                                                                                                                                       |
| Horrell, 2014    | Horrell, L., Goldsmith, K. A., Tylee, A. T., Schmidt, U. H., Murphy, C. L., Bonin, E.-M., . . . Brown, J. S. L. (2014). One-day cognitive-behavioural therapy self-confidence workshops for people with depression: Randomised controlled trial. <i>The British Journal of Psychiatry</i> , 204(3), 222-233. doi:10.1192/bjp.bp.112.121855                                                   |
| Huang, 2015      | Huang, C. Y., Lai, H. L., Chen, C. I., Lu, Y. C., Li, S. C., Wang, L. W., & Su, Y. (2015). Effects of motivational enhancement therapy plus cognitive behaviour therapy on depressive symptoms and health-related quality of life in adults with type II diabetes mellitus: A randomised controlled trial. <i>Quality of Life Research</i> , 25(5), 1275-1283. doi:10.1007/s11136-015-1165-6 |
| Husain, 2017     | Husain N, Chaudhry N, Fatima B, Husain M, Rizwana A, Chaudhry IB, et al. Antidepressant and group psychosocial treatment for depression: A rater blind exploratory RCT from a low income country. <i>Behavioural and Cognitive Psychotherapy</i> . 2014;42(6):693-705.                                                                                                                       |
| Jamison, 1995    | Jamison, C., & Scogin, F. (1995). The outcome of cognitive bibliotherapy with depressed adults. <i>Journal of Consulting and Clinical Psychology</i> , 63(4), 644-650. doi:10.1037/0022-006X.63.4.644                                                                                                                                                                                        |
| Jarrett, 1999    | Jarrett, R. B., Schaffer, M., McIntire, D., Witt-Browder, A., Kraft, D., & Risser, R. C. (1999). Treatment of atypical depression with cognitive therapy or phenelzine: A double-blind, placebo-controlled trial. <i>Archives of general psychiatry</i> , 56(5), 431-437. doi:10.1001/archpsyc.56.5.431                                                                                      |
| Joling, 2011     | Joling, K. J., Hout, H. P., van't Veer-Tazelaar, P. J., Horst, H. E., Cuijpers, P., Ven, P. M., & Marwijk, H. W. (2011). How effective is bibliotherapy for very old adults with subthreshold depression? A randomized controlled trial. <i>American Journal of Geriatric Psychiatry</i> , 19(3), 256-265. doi:10.1097/JGP.0b013e3181ec8859                                                  |
| Kamga, 2017      | Kamga, H., McCusker, J., Yaffe, M., Sewitch, M., Sussman, T., Strumpf, E., . . . Freeman, E. (2017). Self-care tools to treat depressive symptoms in patients with age-related eye disease: a randomized controlled clinical trial. <i>Clinical &amp; experimental ophthalmology</i> , 45(4), 371-378.                                                                                       |
| Kessler, 2009    | Kessler, D., Lewis, G., Kaur, S., Wiles, N., King, M., Weich, S., . . . Peters, T. J. (2009). Therapist-delivered Internet psychotherapy for depression in primary care: A randomised controlled trial. <i>Lancet</i> , 374(9690), 628-634. doi:10.1016/s0140-6736(09)61257-5                                                                                                                |
| King, 2000       | King, M., Sibbald, B., Ward, E., Bower, P., Lloyd, M., Gabbay, M., & Byford, S. (2000). Randomised controlled trial of non-directive counselling, cognitive-behaviour therapy and usual general practitioner care in the management of depression as well as mixed anxiety and depression in primary care. <i>Health Technology Assessment</i> , 4(19), 1-83.                                |

|                   |                                                                                                                                                                                                                                                                                                                                                                                |
|-------------------|--------------------------------------------------------------------------------------------------------------------------------------------------------------------------------------------------------------------------------------------------------------------------------------------------------------------------------------------------------------------------------|
| Laidlaw, 2008     | Laidlaw, K., Davidson, K., Toner, H., Jackson, G., Clark, S., Law, J., . . . Cross, S. (2008). A randomised controlled trial of cognitive behaviour therapy vs treatment as usual in the treatment of mild to moderate late life depression. <i>International journal of geriatric psychiatry</i> , 23(8), 843-850. doi:10.1002/gps.1993                                       |
| Lamers, 2010      | Lamers, F., Jonkers, C. C., Bosma, H., Kempen, G. I., Meijer, J. A., Penninx, B. W., . . . van Eijk, J. T. (2010). A minimal psychological intervention in chronically ill elderly patients with depression: A randomized trial. <i>Psychotherapy and psychosomatics</i> , 79(4), 217-226. doi:10.1159/000313690                                                               |
| Landreville, 1997 | Landreville, P., & Bissonnette, L. (1997). Effects of cognitive bibliotherapy for depressed older adults with a disability. <i>Clinical Gerontologist</i> , 17(4), 35-55. doi:10.1300/J018v17n04_05                                                                                                                                                                            |
| Larcombe, 1984    | Larcombe, N. A., & Wilson, P. H. (1984). An evaluation of cognitive-behaviour therapy for depression in patients with multiple sclerosis. <i>The British Journal of Psychiatry</i> , 145, 366-371. doi:10.1192/bjp.145.4.366                                                                                                                                                   |
| Lerner, 2015      | Lerner, D., Adler, D. A., Rogers, W. H., Chang, H., Greenhill, A., Cymerman, E., & Azocar, F. (2015). A randomized clinical trial of a telephone depression intervention to reduce employee presenteeism and absenteeism. <i>Psychiatric Services</i> , 66(6), 570-577. doi:10.1176/appi.ps.201400350                                                                          |
| Leung, 2013       | Leung, S. S., Lee, A. M., Chiang, V. C., Lam, S., Kuen, Y. W., & Wong, D. F. (2013). Culturally sensitive, preventive antenatal group cognitive-behavioural therapy for Chinese women with depression. <i>International journal of nursing practice</i> , 19(S1), 28-37.                                                                                                       |
| Levin, 2011       | Levin W, Campbell DR, McGovern KB, Gau JM, Kosty DB, Seeley JR, et al. A computer-assisted depression intervention in primary care. <i>Psychological Medicine</i> . 2011;41(7):1373-83.                                                                                                                                                                                        |
| Lintvedt, 2013    | Lintvedt OK, Griffiths KM, Sorensen K, ystvik AR, Wang CE, Eisemann M, et al. Evaluating the effectiveness and efficacy of unguided internet-based self-help intervention for the prevention of depression: A randomized controlled trial. <i>Clinical Psychology and Psychotherapy</i> . 2013;20(1):10-27.                                                                    |
| Liu, 2009         | Liu, E. T.-H., Chen, W.-L., Li, Y.-H., Wang, C. H., Mok, T. J., & Huang, H. S. (2009). Exploring the efficacy of cognitive bibliotherapy and a potential mechanism of change in the treatment of depressive symptoms among the Chinese: A randomized controlled trial. <i>Cognitive Therapy and Research</i> , 33(5), 449-461. doi:10.1007/s10608-008-9228-4                   |
| Lovell, 2008      | Lovell, K., Bower, P., Richards, D., Barkham, M. i., Sibbald, B., Roberts, C., . . . Hennessy, S. (2008). Developing guided self-help for depression using the medical research council complex interventions framework: A description of the modelling phase and results of an exploratory randomised controlled trial. <i>BMC Psychiatry</i> , 8. doi:10.1186/1471-244X-8-91 |
| Malouff, 1988     | Malouff, J. M., Lanyon, R. I., & Schutte, N. S. (1988). Effectiveness of a brief group RET treatment for divorce-related dysphoria. <i>Journal of rational-emotive and cognitive-behavior therapy</i> , 6(3), 162-171. doi:10.1007/BF01064077                                                                                                                                  |
| Martin, 2015      | Martin, P. R., Aiello, R., Gilson, K., Meadows, G., Milgrom, J., & Reece, J. (2015). Cognitive behavior therapy for comorbid migraine and/or tension-type headache and major depressive disorder: An exploratory randomized controlled trial. <i>Behaviour Research and Therapy</i> , 73, 8-18. doi:10.1016/j.brat.2015.07.005                                                 |
| McCusker, 2015    | McCusker J, Cole MG, Yaffe M, Strumpf E, Sewitch M, Sussman T, et al. A randomized trial of a depression self-care toolkit with or without lay telephone coaching for primary care patients with chronic physical conditions. <i>General Hospital Psychiatry</i> . 2015;37(3):257-65.                                                                                          |
| McKee, 2006       | McKee MD, Zayas LH, Fletcher J, Boyd RC, Nam SH. Results of an intervention to reduce perinatal depression among low-income minority women in community primary care. <i>Journal of Social Service Research</i> . 2006;32(4):63-81.                                                                                                                                            |
| Meyer, 2009       | Meyer B, Berger T, Caspar F, Beevers CG, Andersson G, Weiss M. Effectiveness of a novel integrative online treatment for depression (Deprexis): randomized controlled trial. <i>J Med Internet Res</i> . 2009;11(2):e15.                                                                                                                                                       |
| Meyer, 2015       | Meyer B, Bierbrodt J, Schröder J, et al. Effects of an internet intervention (Deprexis) on severe depression symptoms: randomized controlled trial. <i>Internet Interventions</i> . 2015;2(1):48-59.                                                                                                                                                                           |
| Milgrom, 2015     | Milgrom, J., Holt, C., Holt, C. J., Ross, J., Ericksen, J., & Gemmill, A. W. (2015). Feasibility study and pilot randomised trial of an antenatal depression treatment with infant follow-up. <i>Archives of Women's Mental Health</i> , 18(5), 717-730. doi:10.1007/s00737-015-0512-5                                                                                         |

|                 |                                                                                                                                                                                                                                                                                                                                          |
|-----------------|------------------------------------------------------------------------------------------------------------------------------------------------------------------------------------------------------------------------------------------------------------------------------------------------------------------------------------------|
| Milgrom, 2016   | Milgrom, J., Danaher, B. G., Gemmill, A. W., Holt, C., Holt, C. J., Seeley, J. R., . . . Ericksen, J. (2016). Internet cognitive behavioral therapy for women with postnatal depression: A randomized controlled trial of MumMoodBooster. <i>Journal of medical Internet research</i> , 18(3), e54. doi:10.2196/jmir.4993                |
| Mohr, 2000      | Mohr, D. C., Likosky, W., Bertagnolli, A., Goodkin, D. E., Van Der Wende, J., Dwyer, P., & Dick, L. P. (2000). Telephone-administered cognitive-behavioral therapy for the treatment of depressive symptoms in multiple sclerosis. <i>Journal of Consulting and Clinical Psychology</i> , 68(2), 356-361. doi:10.1037/0022-006X.68.2.356 |
| Mohr, 2011      | Mohr, D. C., Carmody, T., Erickson, L., Jin, L., & Leader, J. (2011). Telephone-administered cognitive behavioral therapy for veterans served by community-based outpatient clinics. <i>Journal of Consulting and Clinical Psychology</i> , 79(2), 261-265. doi:10.1037/a0022395                                                         |
| Mohr, 2012      | Mohr DC, Ho J, Duffecy J, Reifler D, Sokol L, Burns MN, et al. Effect of telephone-administered vs face-to-face cognitive behavioral therapy on adherence to therapy and depression outcomes among primary care patients: A randomized trial. <i>Jama</i> . 2012;307(21):2278-85.                                                        |
| Mohr, 2013      | Mohr, D. C., Duffecy, J., Ho, J., Kwasny, M., Cai, X., Burns, M. N., & Begale, M. (2013). A randomized controlled trial evaluating a manualized TeleCoaching protocol for improving adherence to a web-based intervention for the treatment of depression. <i>PLoS ONE</i> , 8(8), e70086. doi:10.1371/journal.pone.0070086              |
| Moldovan, 2013  | Moldovan, R., Cobeanu, O., & David, D. (2013). Cognitive bibliotherapy for mild depressive symptomatology: Randomized clinical trial of efficacy and mechanisms of change. <i>Clinical Psychology and Psychotherapy</i> , 20(6), 482-493. doi:10.1002/cpp.1814                                                                           |
| Moritz, 2012    | Moritz S, Schilling L, Hauschildt M, Schröder J, Treszl A. A randomized controlled trial of internet-based therapy in depression. <i>Behav Res Ther</i> . 2012;50(7-8):513-521.                                                                                                                                                          |
| Mukhtar, 2011   | Mukhtar, F. (2011). Predictors of group cognitive behaviour therapy outcomes for the treatment of depression in Malaysia. <i>Asian journal of psychiatry</i> , 4(2), 125-128. doi:10.1016/j.ajp.2011.04.002                                                                                                                              |
| Naeem, 2013     | Naeem, F., Sarhandi, I., Gul, M., Khalid, M., Aslam, M., & Anbrin, A. (2013). A multicentre randomised controlled trial of a carer supervised culturally adapted cbt (cacbt) based self-help for depression in pakistan. <i>Journal of Affective Disorders</i> , 156, 224-227. doi:10.1016/j.jad.2013.10.051                             |
| Naeem, 2015     | Naeem F, Gul M, Irfan M, Munshi T, Asif A, Rashid S, et al. Brief Culturally adapted CBT (CaCBT) for depression: A randomized controlled trial from Pakistan. <i>Journal of Affective Disorders</i> . 2015;177:101-7.                                                                                                                    |
| Naylor, 2010    | Naylor EV, Antonuccio DO, Litt M, Johnson GE, Spogen DR, Williams R, et al. Bibliotherapy as a treatment for depression in primary care. <i>Journal of clinical psychology in medical settings</i> . 2010;17(3):258-71.                                                                                                                  |
| Newby 2017      | Newby, J., Robins, L., Wilhelm, K., Smith, J., Fletcher, T., Gillis, I., . . . Andrews, G. (2017). Web-Based Cognitive Behavior Therapy for Depression in People With Diabetes Mellitus: a Randomized Controlled Trial. <i>Journal of medical Internet research</i> , 19(5), e157.                                                       |
| O'Mahen, 2013   | O'Mahen, H., Himle, J. A., Fedock, G., Henshaw, E., & Flynn, H. (2013). A pilot randomized controlled trial of cognitive behavioral therapy for perinatal depression adapted for women with low incomes. <i>Depress Anxiety</i> , 30(7), 679-687. doi:10.1002/da.22050                                                                   |
| O'Neil, 2014    | O'Neil A, Taylor B, Sanderson K, Cyril S, Chan B, Hawkes AL, et al. Efficacy and feasibility of a tele-health intervention for acute coronary syndrome patients with depression: Results of the "MoodCare" randomized controlled trial. <i>Annals of Behavioral Medicine</i> . 2014;48(2):163-74.                                        |
| Omid, 2013      | Omid, A., Mohammadkhani, P., Mohammadi, A., & Zargar, F. (2013). Comparing mindfulness based cognitive therapy and traditional cognitive behavior therapy with treatments as usual on reduction of major depressive disorder symptoms. <i>Iranian Red Crescent Medical Journal</i> , 15(2), 142-146. doi:10.5812/ircmj.8018              |
| Pace, 1993      | Pace, T. M., & Dixon, D. N. (1993). Changes in depressive self-schemata and depressive symptoms following cognitive therapy. <i>Journal of counseling psychology</i> , 40(3), 288. doi:10.1037/0022-0167.40.3.288                                                                                                                        |
| Pecher, 1984    | Pecher, D. R., & Edwards, K. J. (1984). A comparison of secular and religious versions of cognitive therapy with depressed Christian college students. <i>Journal of Psychology and Theology</i> .                                                                                                                                       |
| Penckofer, 2012 | Penckofer, S. M., Ferrans, C., Mumby, P., Byrn, M., Emanuele, M. A., Harrison, P. R., . . . Lustman, P. (2012). A psychoeducational intervention (SWEEP) for depressed women                                                                                                                                                             |



|                 |                                                                                                                                                                                                                                                                                                                                                               |
|-----------------|---------------------------------------------------------------------------------------------------------------------------------------------------------------------------------------------------------------------------------------------------------------------------------------------------------------------------------------------------------------|
|                 | with diabetes. <i>Annals of Behavioral Medicine</i> , 44(2), 192-206. doi:10.1007/s12160-012-9377-2                                                                                                                                                                                                                                                           |
| Perini, 2009    | Perini, S., Titov, N., & Andrews, G. (2009). Clinician-assisted Internet-based treatment is effective for depression: Randomized controlled trial. <i>Australian and New Zealand Journal of Psychiatry</i> , 43(6), 571-578. doi:10.1080/00048670902873722                                                                                                    |
| Pibernik, 2009  | Pibernik-Okanovic, M., Begic, D., Ajdukovic, D., Andrijasevic, N., & Metelko, Z. (2009). Psychoeducation versus treatment as usual in diabetic patients with subthreshold depression: Preliminary results of a randomized controlled trial. <i>Trials</i> , 10, 78. doi:10.1186/1745-6215-10-78                                                               |
| Power, 2012     | Power MJ, Freeman C. A randomized controlled trial of IPT versus CBT in primary care: With some cautionary notes about handling missing values in clinical trials. <i>Clinical Psychology and Psychotherapy</i> . 2012;19(2):159-69.                                                                                                                          |
| Propst, 1992    | Propst, L. R., Ostrom, R., Watkins, P., Dean, T., & Mashburn, D. (1992). Comparative efficacy of religious and nonreligious cognitive-behavioral therapy for the treatment of clinical depression in religious individuals. <i>Journal of Consulting and Clinical Psychology</i> , 60(1), 94-103. doi:10.1037/0022-006X.60.1.94                               |
| Pugh, 2014      | Pugh, N. E. (2014). A randomized controlled trial of a therapist-assisted internet cognitive behaviour therapy program for women with postpartum depression. (Doctoral Dissertation), University of Regina, Regina, SK.                                                                                                                                       |
| Qiu, 2013       | Qiu, J., Chen, W., Gao, X., Xu, Y., Tong, H., Yang, M., . . . Yang, M. (2013). A randomized controlled trial of group cognitive behavioral therapy for Chinese breast cancer patients with major depression. <i>J Psychosom Obstet Gynaecol</i> , 34(2), 60-67. doi:10.3109/0167482x.2013.766791                                                              |
| Richards, 2015  | Richards, D., Timulak, L., O'Brien, E., Hayes, C., Vigano, N., Sharry, J., & Doherty, G. (2015). A randomized controlled trial of an internet-delivered treatment: Its potential as a low-intensity community intervention for adults with symptoms of depression. <i>Behaviour Research and Therapy</i> , 75, 20-31. doi:10.1016/j.brat.2015.10.005          |
| Roepke, 2015    | Roepke AM, Jaffee SR, Riffle OM, McGonigal J, Broome R, Maxwell B. Randomized controlled trial of SuperBetter, a smartphone-based/internet-based self-help tool to reduce depressive symptoms. <i>Games for Health</i> 2015; 4(3): 235-46.                                                                                                                    |
| Rohan, 2007     | Rohan, K. J., Roecklein, K. A., Lindsey, K. T., Johnson, L. G., Lippy, R. D., Lacy, T. J., & Barton, F. B. (2007). A randomized controlled trial of cognitive-behavioral therapy, light therapy, and their combination for seasonal affective disorder. <i>Journal of Consulting and Clinical Psychology</i> , 75(3), 489-500. doi:10.1037/0022-006X.75.3.489 |
| Rush, 1981      | Rush AJ, Watkins JT. Group versus individual cognitive therapy: A pilot study. <i>Cognitive Therapy and Research</i> . 1981;5(1):95-103.                                                                                                                                                                                                                      |
| Ruwaard, 2009   | Ruwaard, J., Schrieken, B., Schrijver, M., Broeksteeg, J., Dekker, J., Vermeulen, H., & Lange, A. (2009). Standardized web-based cognitive behavioural therapy of mild to moderate depression: A randomized controlled trial with a long-term follow-up. <i>Cognitive Behaviour Therapy</i> , 38(4), 206-221. doi:10.1080/16506070802408086                   |
| Safren, 2009    | Safren SA, O'Cleirigh C, Tan JY, Raminani SR, Reilly LC, Otto MW, et al. A randomized controlled trial of cognitive behavioral therapy for adherence and depression (CBT-AD) in HIV-infected individuals. <i>Health Psychology</i> . 2009;28(1):1-10.                                                                                                         |
| Safren, 2016    | Safren, S. A., Bedoya, C. A., O'Cleirigh, C., Biello, K. B., Pinkston, M. M., Stein, M. D., . . . Mayer, K. H. (2016). Cognitive behavioural therapy for adherence and depression in patients with HIV: A three-arm randomised controlled trial. <i>The Lancet HIV</i> , 3(11), e529-e538. doi:10.1016/s2352-3018(16)30053-4                                  |
| Saloheimo, 2016 | Saloheimo, H. P., Markowitz, J., Saloheimo, T. H., Laitinen, J. J., Sundell, J., Huttunen, M. O., . . . H. O. K. (2016). Psychotherapy effectiveness for major depression: A randomized trial in a Finnish community. <i>BMC Psychiatry</i> , 16, 131. doi:10.1186/s12888-016-0838-1                                                                          |
| Savard, 2006    | Savard, J., Simard, S., Giguere, I., Ivers, H., Morin, C. M., Maunsell, E., . . . Marceau, D. (2006). Randomized clinical trial on cognitive therapy for depression in women with metastatic breast cancer: Psychological and immunological effects. <i>Palliative and Supportive Care</i> , 4(3), 219-237. doi:10.1017/S1478951506060305                     |
| Schmidt, 1983   | Schmidt, M. M., & Miller, W. R. (1983). Amount of therapist contact and outcome in a multidimensional depression treatment program. <i>Acta Psychiatrica Scandinavica</i> , 67(5), 319-332. doi:10.1111/j.1600-0447.1983.tb00349.x                                                                                                                            |
| Schroder, 2014  | Schroder J, Bruckner K, Fischer A, Lindenau M, Kother U, Vettorazzi E, et al. Efficacy of a psychological online intervention for depression in people with epilepsy: A randomized controlled trial. <i>Epilepsia</i> . 2014;55(12):2069-76.                                                                                                                  |
| Scogin, 1987    | Scogin, F., Hamblin, D., & Beutler, L. (1987). Bibliotherapy for depressed older adults: A self-help alternative. <i>The Gerontologist</i> , 27(3), 383-387. doi:10.1093/geront/27.3.383                                                                                                                                                                      |

|                |                                                                                                                                                                                                                                                                                                                                                                 |
|----------------|-----------------------------------------------------------------------------------------------------------------------------------------------------------------------------------------------------------------------------------------------------------------------------------------------------------------------------------------------------------------|
| Scogin, 1989   | Scogin, F., Jamison, C., & Gochneaur, K. (1989). Comparative efficacy of cognitive and behavioral bibliotherapy for mildly and moderately depressed older adults. <i>Journal of Consulting and Clinical Psychology</i> , 57(3), 403-407. doi:10.1037/0022-006X.57.3.403                                                                                         |
| Scott, 1990    | Scott, M. J., & Stradling, S. G. (1990). Group cognitive therapy for depression produces clinically significant reliable change in community-based settings. <i>Behavioural Psychotherapy</i> , 18(01), 1-19. doi:10.1017/S014134730001795X                                                                                                                     |
| Scott, 1992    | Scott, A. I., & Freeman, C. P. (1992). Edinburgh primary care depression study: Treatment outcome, patient satisfaction, and cost after 16 weeks. <i>Bmj</i> , 304(6831), 883-887. doi:10.1136/bmj.304.6831.883                                                                                                                                                 |
| Scott, 1997    | Scott, C., Tacchi, M. J., Jones, R., & Scott, J. (1997). Acute and one-year outcome of a randomised controlled trial of brief cognitive therapy for major depressive disorder in primary care. <i>The British Journal of Psychiatry</i> , 171, 131-134. doi:10.1192/bjp.171.2.131                                                                               |
| Selmi, 1990    | Selmi, P. M., Klein, M. H., Greist, J. H., Sorrell, S. P., & Erdman, H. P. (1990). Computer-administered cognitive-behavioral therapy for depression. <i>American journal of psychiatry</i> , 147(1), 51-56.                                                                                                                                                    |
| Serfaty, 2009  | Serfaty, M. A., Haworth, D., Blanchard, M., Buszewicz, M., Murad, S., & King, M. (2009). Clinical effectiveness of individual cognitive behavioral therapy for depressed older people in primary care: A randomized controlled trial. <i>Archives of general psychiatry</i> , 66(12), 1332-1340. doi:10.1001/archgenpsychiatry.2009.165                         |
| Sheeber, 2012  | Sheeber, L. B., Seeley, J. R., Feil, E. G., Davis, B., Sorensen, E., Kosty, D. B., & Lewinsohn, P. M. (2012). Development and pilot evaluation of an Internet-facilitated cognitive-behavioral intervention for maternal depression. <i>Journal of Consulting and Clinical Psychology</i> , 80(5), 739-749. doi:10.1037/a0028820                                |
| Simoni, 2013   | Simoni JM, Wiebe JS, Saucedo JA, Huh D, Sanchez G, Longoria V, et al. A preliminary RCT of CBT-AD for adherence and depression among HIV-positive Latinos on the U.S.-Mexico border: The Nuevo Dia study. <i>AIDS and behavior</i> . 2013;17(8):2816-29.                                                                                                        |
| Sinniah, 2017  | Sinniah, A., Oei, T., Maniam, T., & Subramaniam, P. (2017). Positive effects of Individual Cognitive Behavior Therapy for patients with unipolar mood disorders with suicidal ideation in Malaysia: a randomised controlled trial. <i>Psychiatry research</i> , 254, 179-189.                                                                                   |
| Spek, 2007     | Spek, V., Nyklicek, I., Smits, N., Cuijpers, P., Riper, H., Keyzer, J., & Pop, V. (2007). Internet-based cognitive behavioural therapy for subthreshold depression in people over 50 years old: A randomized controlled clinical trial. <i>Psychological Medicine</i> , 37(12), 1797-1806. doi:10.1017/s0033291707000542                                        |
| Strauss, 2012  | Strauss, C., Hayward, M., & Chadwick, P. (2012). Group person-based cognitive therapy for chronic depression: A pilot randomized controlled trial. <i>British Journal of Clinical Psychology</i> , 51(3), 345-350. doi:10.1111/j.2044-8260.2012.02036.x                                                                                                         |
| Taylor, 1977   | Taylor, F. G., & Marshall, W. L. (1977). Experimental analysis of a cognitive-behavioral therapy for depression. <i>Cognitive Therapy and Research</i> , 1(1), 59-72. doi:10.1007/BF01173505                                                                                                                                                                    |
| Taylor, 2009   | Taylor, C. B., Conrad, A., Wilhelm, F. H., Strachowski, D., Khaylis, A., Neri, E., . . . Spiegel, D. (2009). Does improving mood in depressed patients alter factors that may affect cardiovascular disease risk? <i>Journal of Psychiatric Research</i> , 43(16), 1246-1252. doi:10.1016/j.jpsychires.2009.05.006                                              |
| Teichman, 1995 | Teichman, Y., Bar-el, Z., Shor, H., Sirota, P., & Elizur, A. (1995). A comparison of two modalities of cognitive therapy (individual and marital) in treating depression. <i>Psychiatry</i> , 58(2), 136-148. doi:10.1080/00332747.1995.11024721                                                                                                                |
| Teri, 1986     | Teri L, Lewinsohn PM. Individual and group treatment of unipolar depression: Comparison of treatment outcome and identification of predictors of successful treatment outcome. <i>Behavior Therapy</i> . 1986;17(3):215-28.                                                                                                                                     |
| Titov, 2010    | Titov, N., Andrews, G., Davies, M., McIntyre, K., Robinson, E., & Solley, K. (2010). Internet treatment for depression: A randomized controlled trial comparing clinician vs. technician assistance. <i>PLoS ONE</i> , 5(6), e10939. doi:10.1371/journal.pone.0010939                                                                                           |
| Titov, 2015    | Titov, N., Dear, B. F., Ali, S., Zou, J. B., Lorian, C. N., Johnston, L., . . . Fogliati, V. J. (2015). Clinical and cost-effectiveness of therapist-guided internet-delivered cognitive behavior therapy for older adults with symptoms of depression: A randomized controlled trial. <i>Behavior Therapy</i> , 46(2), 193-205. doi:10.1016/j.beth.2014.09.008 |
| Tomasino, 2017 | Tomasino, K., Lattie, E., Ho, J., Palac, H., Kaiser, S., & Mohr, D. (2017). Harnessing Peer Support in an Online Intervention for Older Adults with Depression. <i>American Journal of Geriatric Psychiatry</i> , 25(10), 1109-1119.                                                                                                                            |
| Tovote, 2014   | Tovote, K. A., Fleeer, J., Snippe, E., Peeters, A., Emmelkamp, P. M. G., Sanderman, R., . . . Schroevers, M. J. (2014). Individual mindfulness-based cognitive therapy and cognitive                                                                                                                                                                            |

|                      |                                                                                                                                                                                                                                                                                                                                                           |
|----------------------|-----------------------------------------------------------------------------------------------------------------------------------------------------------------------------------------------------------------------------------------------------------------------------------------------------------------------------------------------------------|
|                      | behavior therapy for treating depressive symptoms in patients with diabetes: Results of a randomized controlled trial. <i>Diabetes Care</i> , 37(9), 2427-2434. doi:10.2337/dc13-2918                                                                                                                                                                     |
| Verduyn, 2003        | Verduyn, C., Barrowclough, C., Roberts, J., Tarrier, N., & Harrington, R. (2003). Maternal depression and child behaviour problems: Randomised placebo-controlled trial of a cognitive-behavioural group intervention. <i>British Journal of Psychiatry</i> , 183(OCT.), 342-348. doi:10.1192/bjp.183.4.342                                               |
| Vernmark, 2010 – sh  | Vernmark, K., Lenndin, J., Bjärehed, J., Carlsson, M., Karlsson, J., Oberg, J., . . . Andersson, G. (2010). Internet administered guided self-help versus individualized e-mail therapy: A randomized trial of two versions of CBT for major depression. <i>Behaviour Research and Therapy</i> , 48(5), 368-376. doi:10.1016/j.brat.2010.01.005           |
| Wagner, 2014         | Wagner B, Horn AB, Maercker A. Internet-based versus face-to-face cognitive-behavioral intervention for depression: A randomized controlled non-inferiority trial. <i>Journal of Affective Disorders</i> . 2014;152-154:113-21.                                                                                                                           |
| Warmerdam,2008       | Warmerdam, L., Straten, A., Twisk, J., Riper, H., & Cuijpers, P. (2008). Internet-based treatment for adults with depressive symptoms: Randomized controlled trial. <i>Journal of medical Internet research</i> , 10(4), e44. doi:10.2196/jmir.1094                                                                                                       |
| Wierzbicki, 1987     | Wierzbicki M, Bartlett TS. The efficacy of group and individual cognitive therapy for mild depression. <i>Cognitive Therapy and Research</i> . 1987;11(3):337-42.                                                                                                                                                                                         |
| Williams, 2013 (aus) | Williams AD, Blackwell SE, Mackenzie A, Holmes EA, Andrews G. Combining imagination and reason in the treatment of depression: A randomized controlled trial of internet-based cognitive-bias modification and internet-CBT for depression. <i>Journal of Consulting and Clinical Psychology</i> . 2013;81(5):793-9.                                      |
| Williams, 2013 (uk)  | Williams, C., Wilson, P., Morrison, J., McMahon, A., Andrew, W., Allan, L., . . . Tansey, L. (2013). Guided self-help cognitive behavioural therapy for depression in primary care: A randomised controlled trial. <i>PLoS ONE</i> , 8(1), e52735. doi:10.1371/journal.pone.0052735                                                                       |
| Wilson, 1983         | Wilson, P. H., Goldin, J. C., & Charbonneau-Powis, M. (1983). Comparative efficacy of behavioral and cognitive treatments of depression. <i>Cognitive Therapy and Research</i> , 7(2), 111-124. doi:10.1007/BF01190064                                                                                                                                    |
| Wollersheim 1991     | Wollersheim, J. P., & Wilson, G. L. (1991). Group treatment of unipolar depression: A comparison of coping, supportive, bibliotherapy, and delayed treatment groups. <i>Professional Psychology: Research and Practice</i> , 22(6), 496. doi:10.1037/0735-7028.22.6.496                                                                                   |
| Wong I, 2008         | Wong, D. F. (2008a). Cognitive and health-related outcomes of group cognitive behavioural treatment for people with depressive symptoms in Hong Kong: Randomized wait-list control study. <i>Australian and New Zealand Journal of Psychiatry</i> , 42(8), 702-711. doi:10.1080/00048670802203418                                                         |
| Wong II, 2008        | Wong, D. F. (2008b). Cognitive behavioral treatment groups for people with chronic depression in Hong Kong: A randomized wait-list control design. <i>Depress Anxiety</i> , 25(2), 142-148. doi:10.1002/da.20286                                                                                                                                          |
| Wuthrich, 2013       | Wuthrich, V. M., & Rapee, R. M. (2013). Randomised controlled trial of group cognitive behavioural therapy for comorbid anxiety and depression in older adults. <i>Behaviour Research and Therapy</i> , 51(12), 779-786. doi:10.1016/j.brat.2013.09.002                                                                                                   |
| Zettle, 1992         | Zettle RD, Rains JC. Group cognitive and contextual therapies in treatment of depression. <i>Journal of clinical psychology</i> . 1989;45(3):436-45.                                                                                                                                                                                                      |
| Zu, 2014             | Zu, S., Xiang, Y.-T., Liu, J., Zhang, L., Wang, G., Ma, X., . . . Li, Z.-J. (2014). A comparison of cognitive-behavioral therapy, antidepressants, their combination and standard treatment for Chinese patients with moderate-severe major depressive disorders. <i>Journal of Affective Disorders</i> , 152-154, 262-267. doi:10.1016/j.jad.2013.09.022 |

eAppendix E. Contribution Plot<sup>a)</sup>

|                                 |                    | Direct comparisons in the network |      |      |      |      |       |      |      |      |      |      |      |      |      |      |      |      |
|---------------------------------|--------------------|-----------------------------------|------|------|------|------|-------|------|------|------|------|------|------|------|------|------|------|------|
|                                 |                    | 1vs2                              | 1vs3 | 1vs4 | 1vs6 | 1vs7 | 1vs8  | 2vs3 | 2vs5 | 2vs6 | 2vs7 | 3vs5 | 3vs6 | 3vs7 | 4vs6 | 4vs7 | 5vs6 | 5vs7 |
| Network meta-analysis estimates | Mixed estimates    |                                   |      |      |      |      |       |      |      |      |      |      |      |      |      |      |      |      |
|                                 | 1vs2               | 13.6                              | 3.3  | 3.4  | 7.2  | 19.8 |       | 8.7  | 9.4  | 4.8  | 10.7 | 0.6  | 2.0  | 2.8  | 2.4  | 1.0  | 2.8  | 7.3  |
|                                 | 1vs3               | 5.5                               | 5.9  | 3.0  | 8.9  | 20.0 |       | 5.7  | 1.1  | 0.5  | 1.8  | 11.2 | 12.3 | 9.0  | 3.0  | 0.9  |      | 10.1 |
|                                 | 1vs4               | 2.3                               | 1.6  | 45.3 | 5.0  | 12.4 |       | 0.6  | 0.9  | 0.8  | 0.1  | 0.5  | 2.4  | 0.6  | 12.0 | 9.4  | 3.8  | 2.5  |
|                                 | 1vs6               | 4.9                               | 3.6  | 5.1  | 12.9 | 10.0 |       | 1.8  | 2.2  | 2.6  | 1.6  | 0.8  | 8.7  | 4.1  | 4.6  | 0.5  | 15.8 | 12.8 |
|                                 | 1vs7               | 5.3                               | 3.2  | 4.9  | 7.0  | 45.0 |       | 0.5  | 1.1  | 0.1  | 3.8  | 1.5  | 1.8  | 4.0  | 1.8  | 3.1  | 6.9  | 9.5  |
|                                 | 1vs8               |                                   |      |      |      |      | 100.0 |      |      |      |      |      |      |      |      |      |      |      |
|                                 | 2vs3               | 8.4                               | 3.3  | 0.9  | 2.5  | 1.8  |       | 16.2 | 11.6 | 5.9  | 9.5  | 12.5 | 12.2 | 7.5  | 0.9  |      | 3.0  | 3.8  |
|                                 | 2vs5               | 8.6                               | 0.6  | 1.1  | 2.9  | 3.9  |       | 10.9 | 15.3 | 6.1  | 10.1 | 8.8  | 3.1  | 0.5  | 1.0  | 0.1  | 13.2 | 13.7 |
|                                 | 2vs6               | 8.4                               | 0.6  | 2.0  | 6.5  | 0.6  |       | 10.6 | 11.8 | 7.5  | 9.0  | 1.4  | 11.2 | 1.5  | 2.5  | 0.5  | 19.5 | 6.3  |
|                                 | 2vs7               | 10.9                              | 1.1  | 0.1  | 2.4  | 14.3 |       | 10.1 | 11.4 | 5.3  | 14.9 | 1.8  | 0.8  | 6.4  | 1.2  | 1.3  | 2.5  | 15.7 |
|                                 | 3vs5               | 0.3                               | 3.1  | 0.3  | 0.5  | 2.5  |       | 6.0  | 4.5  | 0.4  | 0.8  | 24.8 | 17.9 | 8.1  | 0.2  | 0.2  | 18.9 | 11.6 |
|                                 | 3vs6               | 0.8                               | 3.0  | 1.4  | 5.2  | 2.8  |       | 5.2  | 1.4  | 2.6  | 0.3  | 15.9 | 27.7 | 6.6  | 2.0  | 0.6  | 20.8 | 3.5  |
|                                 | 3vs7               | 2.2                               | 4.1  | 0.7  | 4.6  | 11.6 |       | 5.9  | 0.4  | 0.7  | 4.8  | 13.5 | 12.3 | 12.9 | 2.0  | 1.2  | 5.1  | 18.1 |
|                                 | 4vs6               | 3.0                               | 2.3  | 22.5 | 8.5  | 8.7  |       | 1.2  | 1.5  | 1.8  | 1.5  | 0.4  | 6.3  | 3.3  | 11.2 | 6.0  | 11.8 | 9.9  |
|                                 | 4vs7               | 2.1                               | 1.1  | 27.8 | 1.4  | 23.2 |       | 0.1  | 0.2  | 0.6  | 2.6  | 0.7  | 2.9  | 3.3  | 9.5  | 8.6  | 7.1  | 8.4  |
|                                 | 5vs6               | 0.6                               |      | 1.3  | 5.3  | 6.0  |       | 0.7  | 3.4  | 2.6  | 0.6  | 9.5  | 11.7 | 1.5  | 2.2  | 0.9  | 44.7 | 8.9  |
|                                 | 5vs7               | 2.3                               | 1.9  | 1.1  | 5.8  | 11.1 |       | 1.2  | 4.7  | 1.1  | 4.8  | 7.9  | 2.6  | 7.4  | 2.4  | 1.3  | 12.1 | 32.2 |
| Network meta-analysis estimates | Indirect estimates |                                   |      |      |      |      |       |      |      |      |      |      |      |      |      |      |      |      |
|                                 | 1vs5               | 5.3                               | 3.6  | 4.2  | 9.3  | 21.9 |       | 1.3  | 4.4  | 0.8  | 1.2  | 7.1  | 0.8  | 3.0  | 3.1  | 1.1  | 14.0 | 18.7 |
|                                 | 2vs4               | 9.3                               | 1.7  | 22.2 | 2.8  | 8.5  |       | 7.1  | 7.8  | 4.1  | 8.3  | 0.7  | 2.9  | 1.8  | 8.4  | 6.0  | 4.2  | 4.3  |
|                                 | 2vs8               | 9.3                               | 2.2  | 2.3  | 4.9  | 13.4 | 32.1  | 5.9  | 6.4  | 3.3  | 7.3  | 0.4  | 1.4  | 1.9  | 1.6  | 0.7  | 1.9  | 4.9  |
|                                 | 3vs4               | 3.2                               | 3.9  | 21.2 | 4.5  | 9.5  |       | 4.3  | 0.4  |      | 1.5  | 9.4  | 11.3 | 7.0  | 8.9  | 5.8  | 2.1  | 6.9  |
|                                 | 3vs8               | 3.8                               | 4.1  | 2.7  | 6.1  | 13.9 | 30.6  | 4.0  | 0.8  | 0.4  | 1.3  | 7.8  | 8.6  | 6.3  | 2.1  | 0.7  |      | 7.0  |
|                                 | 4vs5               | 3.2                               | 2.1  | 21.5 | 4.9  | 11.3 |       | 0.7  | 3.2  | 0.3  | 1.1  | 5.6  | 0.6  | 2.2  | 9.2  | 6.1  | 13.8 | 14.2 |
|                                 | 4vs8               | 1.4                               | 1.0  | 27.2 | 3.0  | 7.5  | 40.0  | 0.4  | 0.5  | 0.5  |      | 0.3  | 1.4  | 0.4  | 7.2  | 5.6  | 2.3  | 1.5  |
|                                 | 5vs8               | 3.7                               | 2.5  | 2.9  | 6.4  | 15.2 | 30.7  | 0.9  | 3.1  | 0.6  | 0.9  | 4.9  | 0.6  | 2.1  | 2.2  | 0.7  | 9.7  | 13.0 |
|                                 | 6vs7               | 1.4                               | 1.5  | 1.8  | 8.4  | 13.2 |       | 1.5  | 1.5  | 2.7  | 4.3  | 0.2  | 10.3 | 7.1  | 3.5  | 1.6  | 21.2 | 19.9 |
| 6vs8                            | 3.4                | 2.5                               | 3.5  | 8.9  | 12.5 | 20.9 | 1.2   | 1.5  | 1.8  | 1.1  | 0.5  | 6.0  | 2.8  | 3.2  | 0.3  | 10.9 | 8.9  |      |
| 7vs8                            | 3.2                | 1.9                               | 3.0  | 4.2  | 27.4 | 39.7 | 0.3   | 0.7  | 0.1  | 2.3  | 0.9  | 1.1  | 2.4  | 1.1  | 1.9  | 4.2  | 5.7  |      |
| <b>Entire network</b>           |                    | 4.7                               | 2.4  | 8.7  | 5.6  | 13.0 | 11.2  | 4.0  | 3.9  | 2.0  | 3.7  | 5.0  | 6.2  | 4.1  | 4.1  | 2.4  | 9.1  | 9.9  |
| <b>Included studies</b>         |                    | 7                                 | 4    | 4    | 18   | 30   | 2     | 5    | 1    | 18   | 21   | 5    | 35   | 8    | 1    | 6    | 11   | 9    |

a) 1=Individual CBT; 2=Group CBT; 3=guided self-help CBT; 4=Telephone CBT; 5=Unguided self-help CBT; 6= Waiting list; 7=Care-as-usual; 8=Placebo

## eAppendix F. Forest Plots of Comparisons With More than 10 Effect Sizes

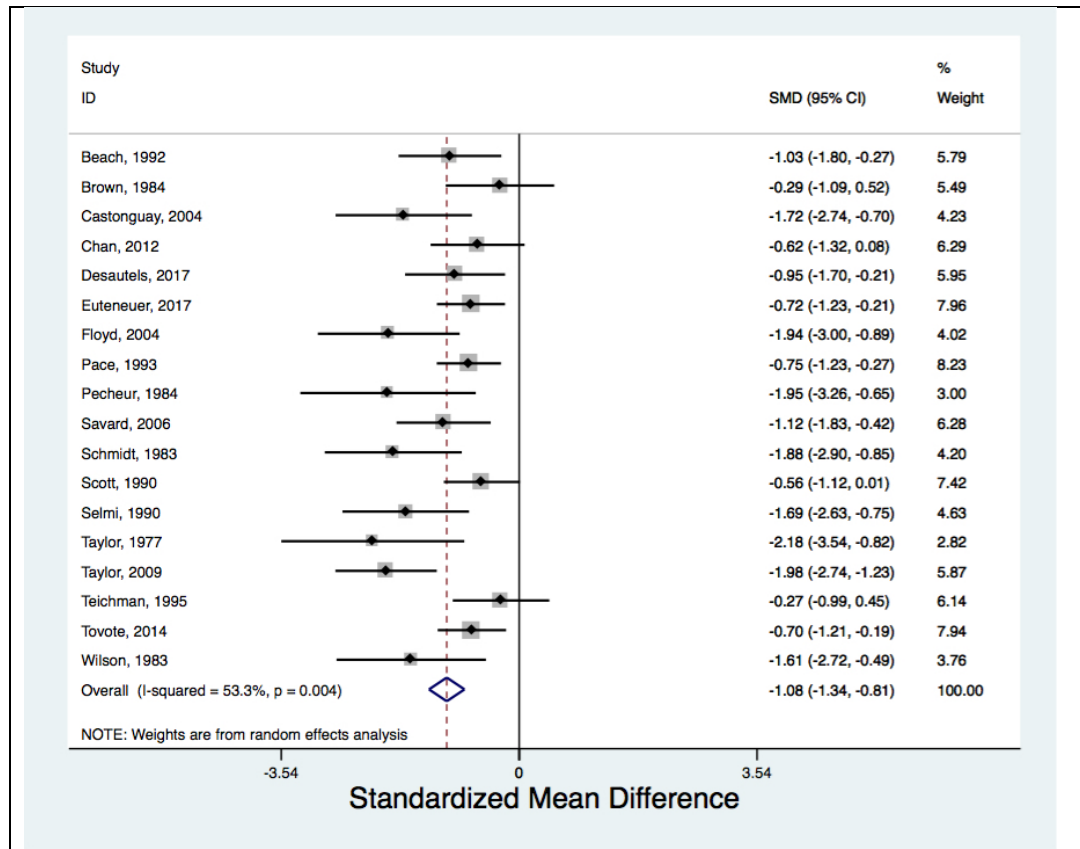

### F.1. Individual CBT versus wait-list

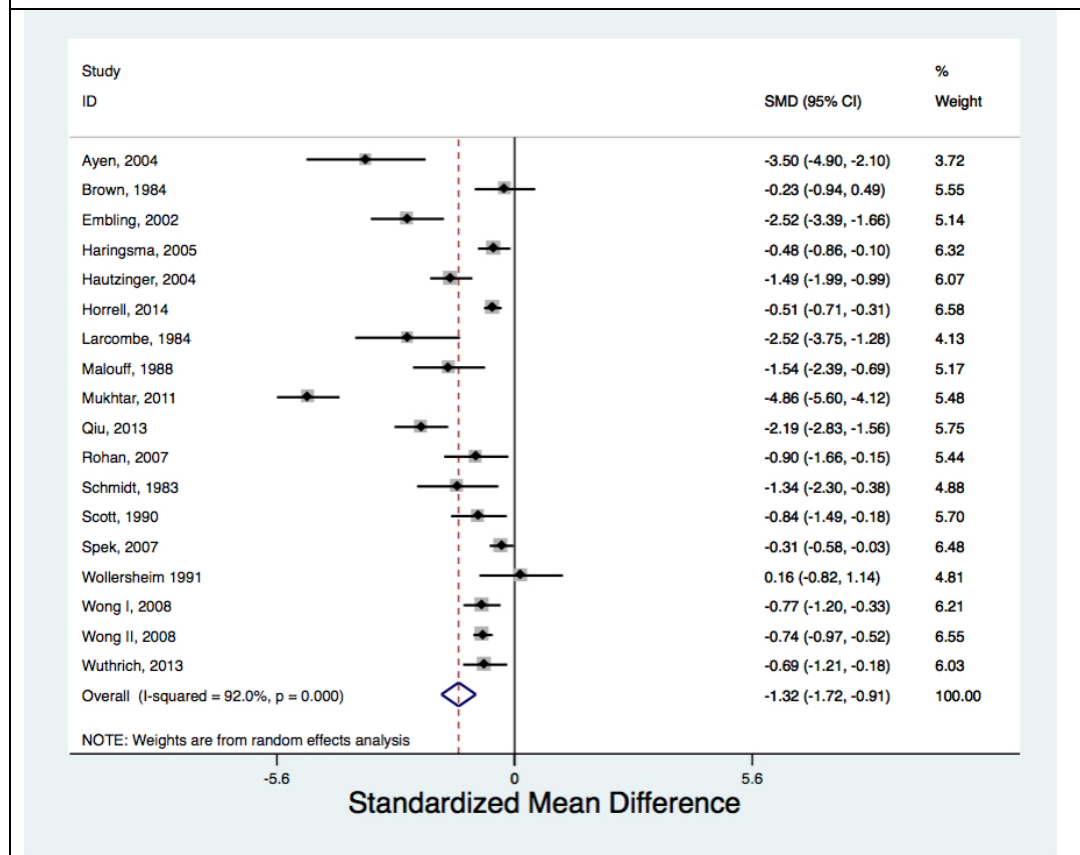

### F.2. Group CBT versus wait-list

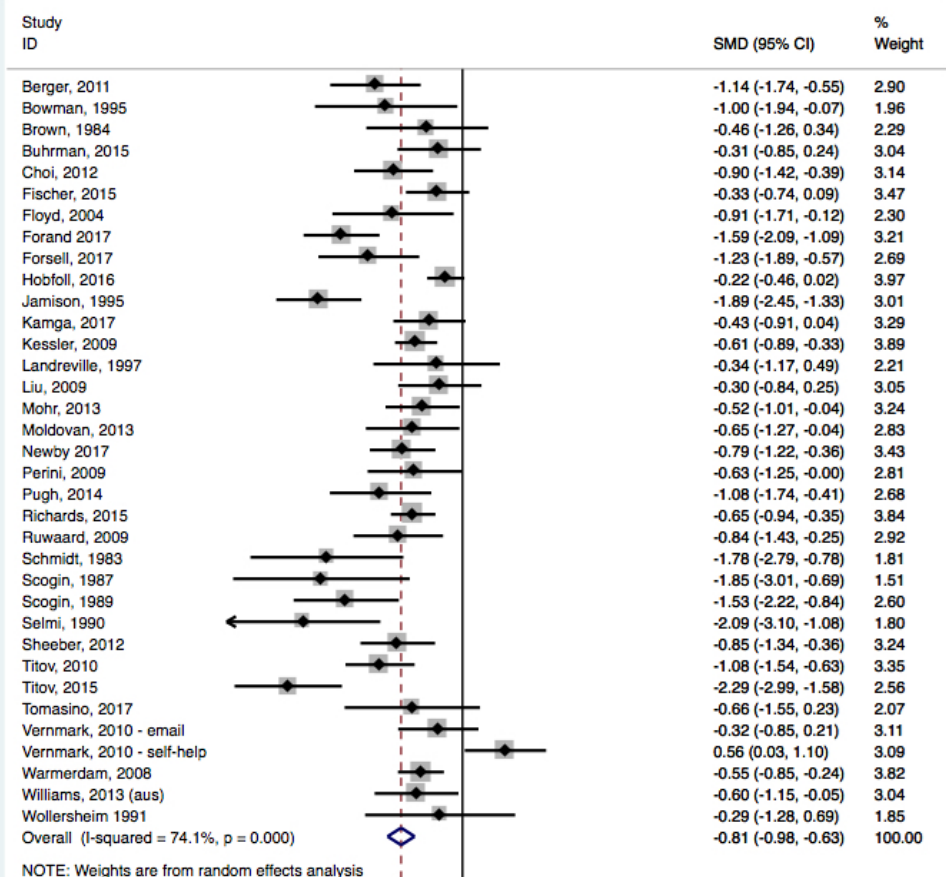

### F.3. Guided self-help versus wait-list

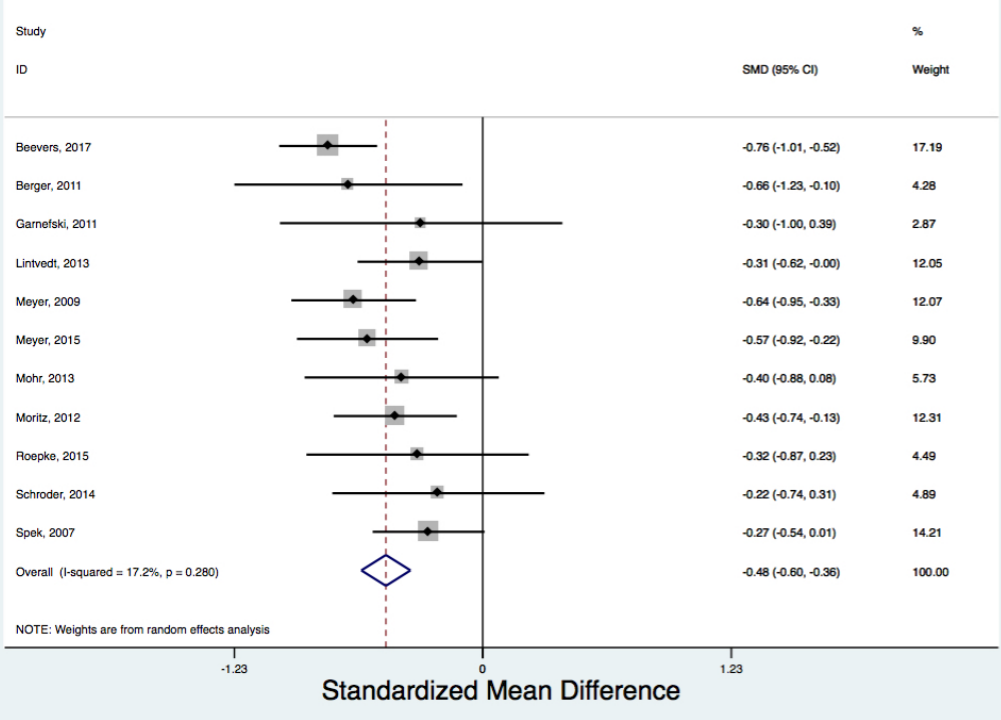



#### F.4. Unguided self-help versus wait list

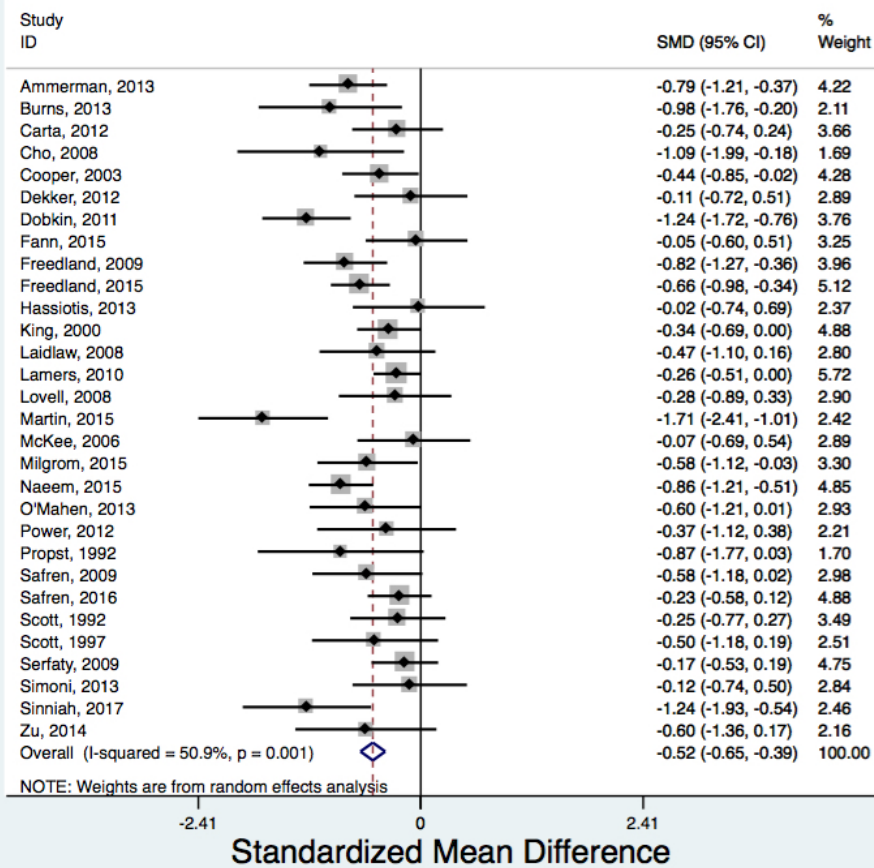

#### F.5 Individual CBT versus care-as-usual

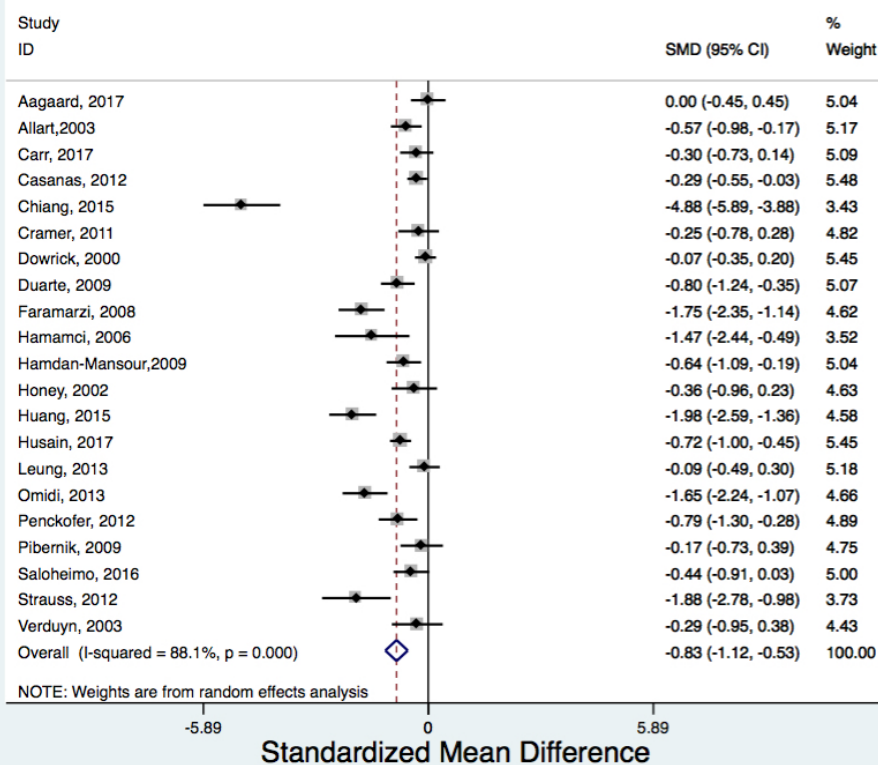

F.6. Group CBT versus care-as-usual



**eAppendix G.** Network Meta-analysis of Treatment Formats of CBT for Adult Depression: Effect Sizes and Acceptability, With 95% Confidence Intervals and Prediction Intervals (including Pill Placebo)

| Effect sizes                               | Individual                                 | Acceptability (RRs)                        |                                            |                                            |                                               | 0.90<br>(0.69~1.17)<br>[0.50~1.62]        | 1.03<br>(0.85~1.24)<br>[0.59~1.80]        | 1.91<br>(1.09~3.35)<br>[0.88~4.14] |
|--------------------------------------------|--------------------------------------------|--------------------------------------------|--------------------------------------------|--------------------------------------------|-----------------------------------------------|-------------------------------------------|-------------------------------------------|------------------------------------|
|                                            |                                            | 1.04<br>(0.80~1.36)<br>[0.58~1.87]         | 1.44<br>(1.09~1.91)<br>[0.80~2.62]         | 0.97<br>(0.70~1.34)<br>[0.52~1.80]         | 1.19<br>(0.90~1.58)<br>[0.66~2.16]            |                                           |                                           |                                    |
| -0.09<br>(-0.32~0.13)<br>[-1.15~0.96]      | <b>Group</b>                               | <b>1.39</b><br>(1.06~1.81)<br>[0.77~2.50]  | 0.93<br>(0.64~1.36)<br>[0.49~1.78]         | 1.15<br>(0.88~1.50)<br>[0.64~2.07]         | 0.87<br>(0.68~1.10)<br>[0.49~1.54]            | 0.99<br>(0.80~1.22)<br>[0.56~1.74]        | 1.83<br>(0.98~3.42)<br>[0.81~4.16]        |                                    |
| 0.15<br>(-0.09~0.40)<br>[-0.90~1.21]       | <b>0.25</b><br>(0.01~0.49)<br>[-0.81~1.30] | <b>Guided SH</b>                           | 0.67<br>(0.46~0.99)<br>[0.35~1.30]         | 0.83<br>(0.65~1.05)<br>[0.47~1.47]         | <b>0.62</b><br>(0.52~0.75)<br>[0.36~1.09]     | <b>0.71</b><br>(0.56~0.90)<br>[0.40~1.27] | 1.32<br>(0.71~2.47)<br>[0.58~3.01]        |                                    |
| -0.00<br>(-0.38~0.37)<br>[-1.10~1.09]      | 0.09<br>(-0.31~0.49)<br>[-1.02~1.19]       | -0.16<br>(-0.57~0.25)<br>[-1.27~0.95]      | <b>Telephone</b>                           | 1.23<br>(0.83~1.82)<br>[0.64~2.37]         | 0.93<br>(0.64~1.35)<br>[0.49~1.77]            | 1.06<br>(0.77~1.46)<br>[0.57~1.96]        | <b>1.97</b><br>(1.03~3.76)<br>[0.85~4.55] |                                    |
| <b>0.50</b><br>(0.21~0.78)<br>[-0.57~1.56] | <b>0.59</b><br>(0.30~0.87)<br>[-0.48~1.66] | <b>0.34</b><br>(0.07~0.61)<br>[-0.72~1.41] | <b>0.50</b><br>(0.07~0.93)<br>[-0.62~1.62] | <b>Unguided SH</b>                         | <b>0.75</b><br>(0.62~0.92)<br>[0.43~1.32]     | 0.86<br>(0.68~1.09)<br>[0.48~1.53]        | 1.60<br>(0.85~2.99)<br>[0.70~3.64]        |                                    |
| <b>1.02</b><br>(0.80~1.24)<br>[-0.03~2.07] | <b>1.11</b><br>(0.90~1.33)<br>[0.06~2.16]  | <b>0.87</b><br>(0.69~1.04)<br>[-0.18~1.91] | <b>1.02</b><br>(0.63~1.42)<br>[-0.08~2.13] | <b>0.52</b><br>(0.28~0.77)<br>[-0.54~1.58] | <b>Waiting list</b>                           | 1.14<br>(0.91~1.43)<br>[0.65~2.02]        | 2.12<br>(1.14~3.93)<br>[0.94~4.79]        |                                    |
| <b>0.63</b><br>(0.45~0.80)<br>[-0.42~1.67] | <b>0.72</b><br>(0.52~0.92)<br>[-0.33~1.77] | <b>0.47</b><br>(0.25~0.70)<br>[-0.58~1.53] | <b>0.63</b><br>(0.27~0.99)<br>[-0.46~1.72] | 0.13<br>(-0.12~0.39)<br>[-0.93~1.19]       | <b>-0.39</b><br>(-0.60~-0.18)<br>[-1.44~0.66] | <b>Care as usual</b>                      | 1.86<br>(1.03~3.36)<br>[0.84~4.12]        |                                    |
| 0.42<br>(-0.36~1.20)<br>[-0.88~1.71]       | 0.51<br>(-0.30~1.32)<br>[-0.80~1.83]       | 0.26<br>(-0.55~1.08)<br>[-1.05~1.58]       | 0.42<br>(-0.44~1.29)<br>[-0.93~1.77]       | -0.08<br>(-0.91~0.75)<br>[-1.40~1.25]      | -0.60<br>(-1.41~0.21)<br>[-1.91~0.71]         | -0.21<br>(-1.01~0.59)<br>[-1.52~1.10]     | <b>Pill placebo</b>                       |                                    |

**eAppendix H.** Characteristics of Included Studies Across the Different Comparisons

|            | <i>Recruitment</i> |          |                 |          | <i>Diagnosis</i> |          |          |          | <i>Adults</i> |          | <i>Low RoB</i> |          | <i>Western</i> |          | <i>Total</i> |
|------------|--------------------|----------|-----------------|----------|------------------|----------|----------|----------|---------------|----------|----------------|----------|----------------|----------|--------------|
|            | <i>Community</i>   |          | <i>Clinical</i> |          | <i>Other</i>     |          |          |          |               |          |                |          |                |          |              |
|            | <i>N</i>           | <i>%</i> | <i>N</i>        | <i>%</i> | <i>N</i>         | <i>%</i> | <i>N</i> | <i>%</i> | <i>N</i>      | <i>%</i> | <i>N</i>       | <i>%</i> | <i>N</i>       | <i>%</i> | <i>N</i>     |
| Ind vs Grp | 6                  | 85.7     | 1               | 14.3     | 0                | 0.0      | 5        | 71.4     | 7             | 100.0    | 1              | 14.3     | 7              | 100.0    | 7            |
| Ind vs GSH | 4                  | 100.0    | 0               | 0.0      | 0                | 0.0      | 3        | 75.0     | 3             | 75.0     | 0              | 0.0      | 4              | 100.0    | 4            |
| Ind vs Tel | 2                  | 50.0     | 1               | 25.0     | 1                | 25.0     | 3        | 75.0     | 1             | 25%      | 1              | 25.0     | 4              | 100.0    | 4            |
| Ind vs WL  | 11                 | 61.1     | 3               | 16.7     | 4                | 22.2     | 10       | 55.6     | 10            | 55.6     | 2              | 11.1     | 16             | 88.9     | 18           |
| Ind vs CAU | 7                  | 23.3     | 11              | 36.7     | 12               | 40.0     | 23       | 76.7     | 10            | 33.3     | 13             | 43.3     | 25             | 83.3     | 30           |
| Ind vs Pla | 1                  | 50.0     | 1               | 50.0     | 0                | 0.0      | 2        | 100.0    | 2             | 100.0    | 2              | 100.0    | 2              | 100.0    | 2            |
| Grp vs GSH | 5                  | 100.0    | 0               | 0.0      | 0                | 0.0      | 3        | 60.0     | 5             | 100.0    | 0              | 0.0      | 5              | 100.0    | 5            |
| Grp vs WL  | 13                 | 72.2     | 2               | 11.1     | 3                | 16.7     | 13       | 72.2     | 10            | 55.6     | 6              | 33.3     | 14             | 77.8     | 18           |
| Grp vs CAU | 5                  | 23.8     | 7               | 33.3     | 9                | 42.9     | 11       | 52.4     | 9             | 42.9     | 5              | 23.8     | 13             | 61.9     | 21           |
| GSH vs USH | 3                  | 60.0     | 1               | 20.0     | 1                | 20.0     | 2        | 40.0     | 4             | 80.0     | 5              | 100.0    | 5              | 100.0    | 5            |
| GSH vs WL  | 29                 | 82.9     | 1               | 2.9      | 5                | 14.3     | 16       | 45.7     | 19            | 54.3     | 17             | 48.6     | 34             | 97.1     | 35           |
| GSH vs CAU | 1                  | 12.5     | 3               | 37.5     | 4                | 50.0     | 2        | 25.0     | 5             | 62.5     | 5              | 62.5     | 7              | 87.5     | 8            |
| Tel vs CAU | 1                  | 16.7     | 1               | 16.7     | 4                | 66.7     | 3        | 50.0     | 1             | 16.7     | 1              | 16.7     | 6              | 100.0    | 6            |
| USH vs WL  | 9                  | 81.8     | 0               | 0.0      | 2                | 18.2     | 2        | 18.2     | 7             | 63.6     | 8              | 72.7     | 11             | 91.7     | 11           |
| USH vs CAU | 4                  | 44.4     | 4               | 44.4     | 1                | 11.1     | 0        | 0.0      | 9             | 100.0    | 8              | 88.9     | 9              | 100.0    | 9            |

## Appendix I. Inconsistency Factors for the Network

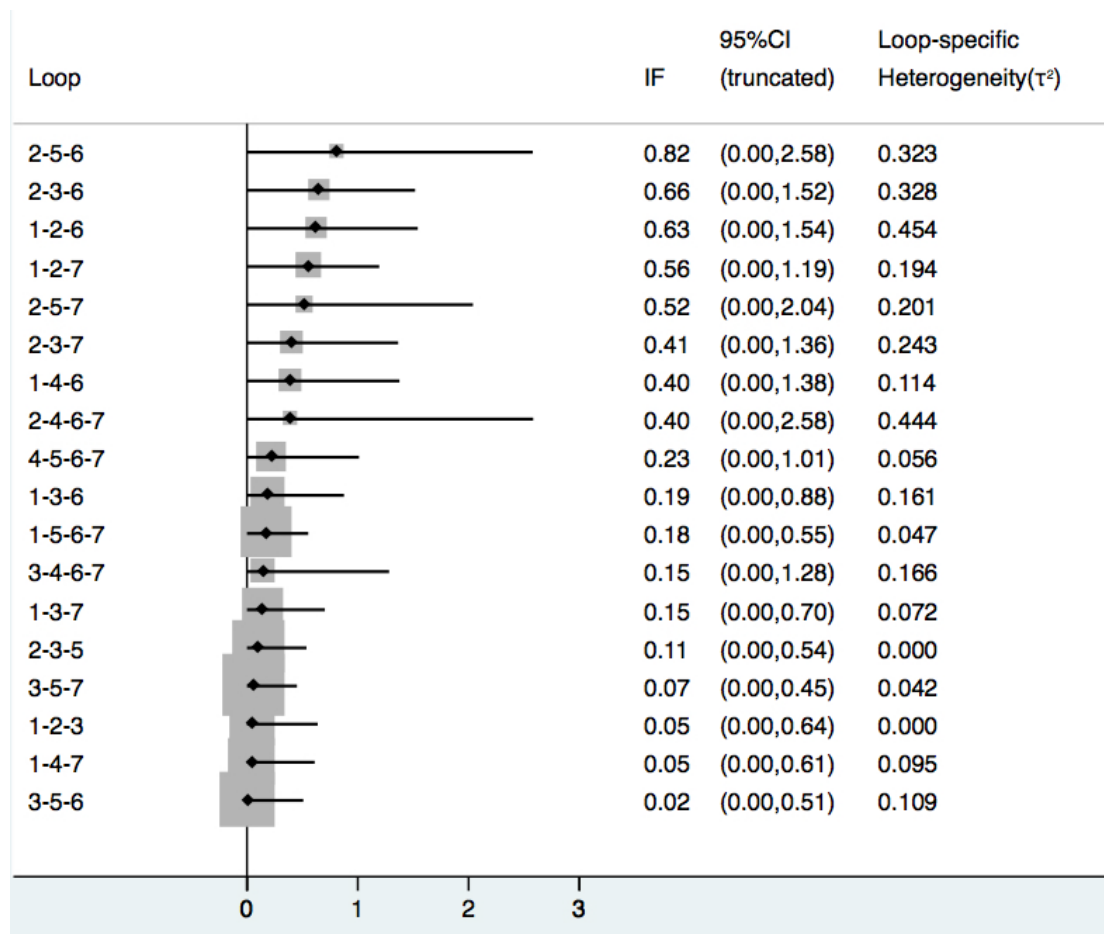

## eAppendix J. GRADE Ratings for All Contrasts

Using the GRADE framework<sup>1</sup> and the recently developed web application to apply this framework<sup>2</sup>, we evaluated the certainty of evidence for each network estimate according to the following criteria:

**Study limitations (Within study bias):** We categorized the overall risk of bias of each study as low risk of bias when none of the four assessed risk of bias item was rated high risk, as moderate risk of bias when one or two items were rated high risk, and as high risk when three or four were rated high risk. We then used the contribution matrix to calculate the percentage of contribution from each study, and finally assessed the study limitation for each network estimate based on the weighted average risk of bias of the contributing studies.

**Publication bias (Across studies bias):** We spotted major concerns when Egger's test was statistically significant in pairwise comparisons.

**Indirectness:** We considered that there was no concern in this domain as the included studies matched our study questions.

**Imprecision:** We considered a clinically meaningful threshold for SMD to be 0.20 and graded the degree of concerns according to the possible changes in clinical inference according to the following criteria:

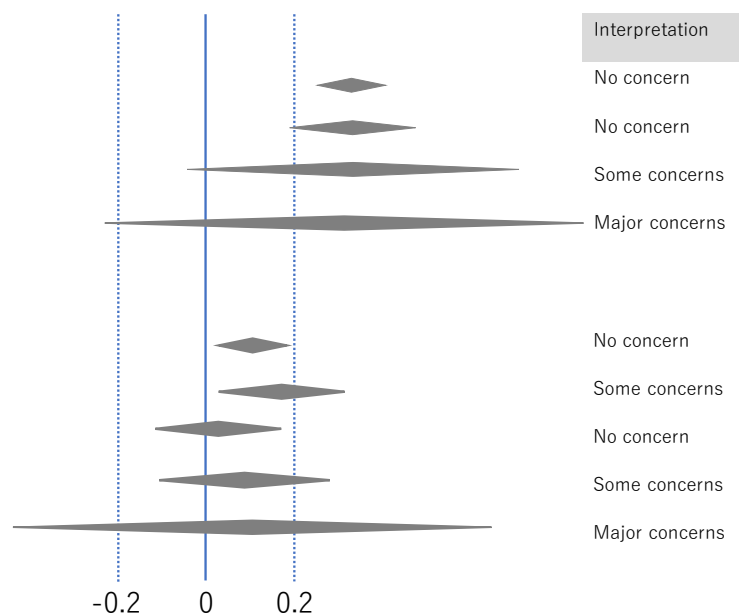

**Heterogeneity:** We evaluated the degree of concerns through comparing the clinical inference based on the 95% confidence intervals (CI) and that based on the 95% prediction interval (PrI), the latter reflecting the degree of heterogeneity. Applying the same clinical inference framework as for imprecision, we saw no concerns in heterogeneity when the two judgements matched (e.g. no concern based on 95% CI and no concern based on 95% PrI), some concerns when they differed by one degree (e.g. no concern based on 95% CI but some concerns based on 95% PrI), and major concerns when they differed by two degrees (e.g. no concern based on 95% CI but major concerns based on 95% PrI).

**Incoherence (Inconsistency):** For inconsistency, we looked at the results of side splitting (8.3.1.2) and we saw major concerns when  $p < 0.10$  but no concern otherwise.

<sup>1</sup> Salanti G, Del Giovane C, Chaimani A, Caldwell DM, Higgins JP. Evaluating the quality of evidence from a network meta-analysis. *PLoS One* 2014; **9**: e99682.

<sup>2</sup> <http://cinema.ispm.ch/> (accessed Nov 8, 2018)

| Comparison        | Number of Studies | Within-study bias | Across-studies bias | Indirectness | Imprecision    | Heterogeneity  | Incoherence    | Confidence rating |
|-------------------|-------------------|-------------------|---------------------|--------------|----------------|----------------|----------------|-------------------|
| Mixed evidence    |                   |                   |                     |              |                |                |                |                   |
| 1 vs 2            | 7                 | Some concerns     | Undetected          | No concerns  | Some concerns  | Some concerns  | Major concerns | Low               |
| 1 vs 3            | 4                 | Some concerns     | Undetected          | No concerns  | Some concerns  | Some concerns  | No concerns    | Moderate          |
| 1 vs 4            | 4                 | Some concerns     | Undetected          | No concerns  | Major concerns | No concerns    | No concerns    | Low               |
| 1 vs 6            | 18                | Some concerns     | Suspected           | No concerns  | No concerns    | No concerns    | No concerns    | Low               |
| 1 vs 7            | 30                | Some concerns     | Suspected           | No concerns  | No concerns    | Some concerns  | Major concerns | Very low          |
| 1 vs 8            | 2                 | No concerns       | Undetected          | No concerns  | Major concerns | No concerns    | No concerns    | Moderate          |
| 2 vs 3            | 5                 | Some concerns     | Undetected          | No concerns  | No concerns    | Major concerns | Major concerns | Very low          |
| 2 vs 5            | 1                 | Some concerns     | Undetected          | No concerns  | No concerns    | Major concerns | No concerns    | Low               |
| 2 vs 6            | 18                | Some concerns     | Suspected           | No concerns  | No concerns    | No concerns    | No concerns    | Low               |
| 2 vs 7            | 21                | Some concerns     | Suspected           | No concerns  | No concerns    | Some concerns  | No concerns    | Low               |
| 3 vs 5            | 5                 | No concerns       | Undetected          | No concerns  | No concerns    | Major concerns | No concerns    | Moderate          |
| 3 vs 6            | 35                | Some concerns     | Suspected           | No concerns  | No concerns    | No concerns    | No concerns    | Low               |
| 3 vs 7            | 8                 | Some concerns     | Suspected           | No concerns  | No concerns    | Major concerns | No concerns    | Low               |
| 4 vs 6            | 1                 | Some concerns     | Suspected           | No concerns  | No concerns    | No concerns    | No concerns    | Very low          |
| 4 vs 7            | 6                 | Some concerns     | Suspected           | No concerns  | No concerns    | Major concerns | No concerns    | Very low          |
| 5 vs 6            | 11                | No concerns       | Suspected           | No concerns  | No concerns    | Major concerns | No concerns    | Low               |
| 5 vs 7            | 9                 | No concerns       | Suspected           | No concerns  | Some concerns  | Some concerns  | No concerns    | Low               |
| Indirect evidence |                   |                   |                     |              |                |                |                |                   |
| 1 vs 5            | --                | Some concerns     | Undetected          | No concerns  | No concerns    | Major concerns | No concerns    | Low               |
| 2 vs 4            | --                | Some concerns     | Undetected          | No concerns  | Major concerns | No concerns    | No concerns    | Low               |
| 2 vs 8            | --                | Some concerns     | Undetected          | No concerns  | Some concerns  | Some concerns  | No concerns    | Moderate          |
| 3 vs 4            | --                | Some concerns     | Undetected          | No concerns  | Some concerns  | Some concerns  | No concerns    | Moderate          |
| 3 vs 8            | --                | Some concerns     | Undetected          | No concerns  | Major concerns | No concerns    | No concerns    | Low               |
| 4 vs 5            | --                | Some concerns     | Undetected          | No concerns  | No concerns    | Major concerns | No concerns    | Low               |
| 4 vs 8            | --                | No concerns       | Undetected          | No concerns  | Major concerns | No concerns    | No concerns    | Moderate          |
| 5 vs 8            | --                | No concerns       | Undetected          | No concerns  | Major concerns | No concerns    | No concerns    | Moderate          |
| 6 vs 7            | --                | Some concerns     | Undetected          | No concerns  | No concerns    | Major concerns | No concerns    | Low               |
| 6 vs 8            | --                | Some concerns     | Undetected          | No concerns  | Some concerns  | Some concerns  | No concerns    | Moderate          |
| 7 vs 8            | --                | No concerns       | Undetected          | No concerns  | Major concerns | No concerns    | No concerns    | Moderate          |

- 1=Individual
- 2=Group
- 3=GSH
- 4=Telephone
- 5=USH
- 6=WL
- 7=CAU
- 8=Placebo

**eAppendix K.** Long Term Effects of Different Treatment Formats and Control Conditions in CBT <sup>a)</sup>

| Contrast      |           | Network meta-analyses |            |            | Pairwise meta-analyses |              |             |                |        |                  |             |
|---------------|-----------|-----------------------|------------|------------|------------------------|--------------|-------------|----------------|--------|------------------|-------------|
|               |           | SMD                   | 95% CI     | 95% PI     | N                      | SMD          | 95% CI      | I <sup>2</sup> | 95% CI | Tau <sup>2</sup> | Egger (p)   |
| Individual vs | Group     | -0.18                 | -0.59~0.23 | -1.61~1.25 | 3                      | <u>0.45</u>  | 0.05~0.84   | 0              | 0~73   | 0.00             | 0.13        |
|               | GSH       | -0.16                 | -0.65~0.33 | -1.62~1.30 | 2                      | 0.44         | -0.71~1.58  | 61             | b)     | 0.43             | b)          |
|               | Telephone | <u>-0.93</u>          | -1.77~0.08 | -2.54~0.69 | 1                      | -0.24        | -0.48~0.01  | b)             | b)     | b)               | b)          |
|               | USH       | 0.12                  | -0.37~0.61 | -1.34~1.57 | 0                      |              |             |                |        |                  |             |
|               | WL        | 0.52                  | -0.25~1.29 | -1.06~2.10 | 0                      |              |             |                |        |                  |             |
|               | CAU       | <u>0.45</u>           | 0.14~0.75  | -0.95~1.85 | 19                     | <u>-0.43</u> | -0.63~-0.23 | 66             | 39~78  | 0.12             | 0.39        |
| Group vs      | GSH       | 0.02                  | -0.43~0.47 | -1.42~1.46 | 4                      | 0.16         | -0.31~0.63  | 47             | 0~81   | 0.11             | 0.70        |
|               | Telephone | -0.75                 | -1.62~0.13 | -2.38~0.89 | 0                      |              |             |                |        |                  |             |
|               | USH       | 0.30                  | -0.16~0.76 | -1.15~1.75 | 1                      | 0.20         | -0.08~0.48  | b)             | b)     | b)               | b)          |
|               | WL        | 0.70                  | -0.01~1.41 | -0.85~2.25 | 2                      | -0.78        | -2.20~0.65  | 95             | b)     | 1.00             | b)          |
|               | CAU       | <u>0.63</u>           | 0.32~0.94  | -0.78~2.03 | 16                     | <u>-0.64</u> | -1.01~-0.27 | 91             | 87~93  | 0.49             | <u>0.04</u> |
| GSH vs        | Telephone | -0.77                 | -1.69~0.16 | -2.43~0.90 | 0                      |              |             |                |        |                  |             |
|               | USH       | 0.28                  | -0.19~0.75 | -1.17~1.73 | 4                      | <u>-0.22</u> | -0.38~-0.06 | 0              | 0~68   | 0.00             | 0.66        |
|               | WL        | 0.68                  | -0.05~1.41 | -0.88~2.24 | 1                      | <u>-0.56</u> | -0.83~-0.28 |                |        |                  |             |
|               | CAU       | <u>0.61</u>           | 0.19~1.03  | -0.83~2.04 | 5                      | -0.42        | -0.73~-0.12 | 66             | 0~85   | 0.07             | 0.08        |
| Telephone vs  | USH       | <u>1.04</u>           | 0.13~1.96  | -0.61~2.70 | 0                      |              |             |                |        |                  |             |
|               | WL        | <u>1.45</u>           | 0.35~2.54  | -0.32~3.21 | 0                      |              |             |                |        |                  |             |
|               | CAU       | <u>1.37</u>           | 0.54~2.20  | -0.24~2.98 | 2                      | -2.19        | -6.08~1.71  | 99             | b)     | 7.81             | b)          |
| USH vs        | WL        | 0.40                  | -0.31~1.11 | -1.15~1.95 | 2                      | <u>-0.29</u> | -0.51~-0.07 | 0              | b)     | 0.00             | b)          |
|               | CAU       | 0.33                  | -0.07~0.72 | -1.10~1.75 | 9                      | -0.23        | -0.40~-0.07 | 57             | 0~78   | 0.03             | 0.05        |
| WL vs         | CAU       | -0.07                 | -0.79~0.64 | -1.63~1.48 | 0                      |              |             |                |        |                  |             |

a) There were no studies on placebo

b) This cannot be calculated when the number of studies is smaller than 3

**eAppendix L. Metaregression Analyses**

| <i>Predictor</i>                |           | <i>Ind vs Grp</i>   | <i>Ind vs GSH</i>   | <i>Ind vs Tel</i>   | <i>Ind vs USH</i>   | <i>Ind vs WL</i>    | <i>Ind vs CAU</i>   | <i>Ind vs PLA</i>   |
|---------------------------------|-----------|---------------------|---------------------|---------------------|---------------------|---------------------|---------------------|---------------------|
|                                 |           | <i>Coeff (SE) p</i> |
| Recruitment                     | Community | Ref.                |                     |                     |                     |                     |                     |                     |
|                                 | Clinical  | -0.73 (0.41) 0.02   | -0.41 (0.43) 0.34   |                     | -0.12 (0.45) 0.78   | -0.57 (0.42) 0.17   | -0.58 (0.32) 0.07   |                     |
|                                 | Other     | -0.43 (0.36) 0.23   | 0.15 (0.41) 0.70    | -0.80 (0.76) 0.29   | -0.08 (0.48) 0.87   | 0.11 (0.35) 0.75    | -0.38 (0.26) 0.15   |                     |
| Diagnostic interview (y/n)      |           | -0.01 (0.31) 0.98   | 0.18 (0.31) 0.56    | 0.96 (0.55) 0.08    | 0.10 (0.47) 0.83    | 0.31 (0.29) 0.28    | 0.10 (0.23) 0.67    |                     |
| Adults vs specific target group |           | -0.04 (0.38) 0.93   | -0.17 (0.35) 0.62   | -0.87 (0.90) 0.33   | -0.46 (0.43) 0.29   | -0.32 (0.33) 0.33   | 0.07 (0.33) 0.83    |                     |
| Publication year (continuous)   |           | -0.01 (0.01) 0.38   | 0.00 (0.02) 0.79    | -0.07 (0.07) 0.33   | -0.02 (0.04) 0.53   | -0.00 (0.01) 0.89   | -0.01 (0.02) 0.73   | 0.02 (0.08) 0.78    |
| Western vs non Western country  |           | 0.42 (0.43) 0.33    | -0.17 (0.57) 0.77   | -0.93 (0.82) 0.26   |                     | -0.06 (0.44) 0.89   | 0.02 (0.09) 0.78    |                     |
| Risk of bias (continuous)       |           | 0.20 (0.12) 0.08    | -0.04 (0.14) 0.78   | 0.38 (0.35) 0.28    | 0.02 (0.20) 0.92    | -0.15 (0.12) 0.20   | 0.01 (0.11) 0.93    |                     |

**eAppendix M. Sensitivity Analyses: Only Studies With Low Risk of Bias**

| Contrast      |           | Network meta-analyses |             | Pairwise meta-analyses |              |             |    | I <sup>2</sup> | 95% CI | Tau <sup>2</sup> | Egger (p) |
|---------------|-----------|-----------------------|-------------|------------------------|--------------|-------------|----|----------------|--------|------------------|-----------|
|               |           | SMD                   | 95% CI      | N                      | SMD          | 95% CI      |    |                |        |                  |           |
| Individual vs | Group     | -0.08                 | -0.35~0.19  | 1                      | 0.29         | -0.32~0.90  | a) | a)             | a)     | a)               |           |
|               | GSH       | 0.03                  | -0.23~0.29  | 0                      |              |             |    |                |        |                  |           |
|               | Telephone | 0.09                  | -0.28~0.46  | 1                      | -0.14        | -0.37~0.09  | a) | a)             | a)     | a)               |           |
|               | USH       | <u>0.29</u>           | 0.05~0.54   | 0                      |              |             |    |                |        |                  |           |
|               | WL        | <u>0.73</u>           | 0.48~0.98   | 2                      | <u>-0.70</u> | -1.15~-0.25 | 0  | a)             | 0.00   | a)               |           |
|               | CAU       | <u>0.42</u>           | 0.24~0.60   | 13                     | <u>-0.42</u> | -0.58~-0.26 | 36 | 0~66           | 0.03   | 0.74             |           |
|               | Placebo   | 0.41                  | -0.06~0.88  | 2                      | <u>-0.40</u> | -0.68~-0.11 | 0  | a)             |        | a)               |           |
| Group vs      | GSH       | 0.12                  | -0.13~0.36  | 0                      |              |             |    |                |        |                  |           |
|               | Telephone | 0.17                  | -0.24~0.58  | 0                      |              |             |    |                |        |                  |           |
|               | USH       | <u>0.37</u>           | 0.13~0.61   | 1                      | -0.06        | -0.34~0.22  | a) | a)             | a)     | a)               |           |
|               | WL        | <u>0.81</u>           | 0.58~1.04   | 6                      | <u>-1.00</u> | -1.49~-0.50 | 88 | 75~93          | 0.31   | 0.11             |           |
|               | CAU       | <u>0.50</u>           | 0.29~0.72   | 5                      | <u>-0.42</u> | -0.71~-0.13 | 73 | 0~87           | 0.08   | 0.74             |           |
|               | Placebo   | 0.49                  | -0.05~1.04  | 0                      |              |             |    |                |        |                  |           |
| GSH vs        | Telephone | 0.06                  | -0.34~0.45  | 0                      |              |             |    |                |        |                  |           |
|               | USH       | <u>0.26</u>           | 0.07~0.45   | 5                      | <u>-0.37</u> | -0.55~-0.18 | 17 | 0~70           | 0.01   | 0.55             |           |
|               | WL        | <u>0.69</u>           | 0.54~0.85   | 17                     | <u>-0.68</u> | -0.90~-0.46 | 73 | 52~82          | 0.15   | 0.30             |           |
|               | CAU       | <u>0.39</u>           | 0.19~0.59   | 5                      | <u>-0.50</u> | -0.85~-0.15 | 65 | 0~85           | 0.09   | <u>0.05</u>      |           |
|               | Placebo   | 0.38                  | -0.16~0.92  | 0                      |              |             |    |                |        |                  |           |
| Telephone vs  | USH       | 0.20                  | -0.19~0.59  | 0                      |              |             |    |                |        |                  |           |
|               | WL        | <u>0.64</u>           | 0.26~1.02   | 1                      | <u>-0.69</u> | -1.06~-0.31 | a) | a)             | a)     | a)               |           |
|               | CAU       | 0.33                  | -0.04~0.70  | 1                      | <u>-0.35</u> | -0.71~0.01  | a) | a)             | a)     | a)               |           |
|               | Placebo   | 0.32                  | -0.28~0.92  | 0                      |              |             |    |                |        |                  |           |
| USH vs        | WL        | <u>0.44</u>           | 0.26~0.61   | 8                      | <u>-0.42</u> | -0.55~-0.29 | 0  | 0~56           | 0.00   | 0.88             |           |
|               | CAU       | 0.13                  | -0.05~0.30  | 8                      | -0.14        | -0.30~0.02  | 62 | 0~81           | 0.03   | <u>0.01</u>      |           |
|               | Placebo   | 0.12                  | -0.41~0.65  | 0                      |              |             |    |                |        |                  |           |
| WL vs         | CAU       | <u>-0.31</u>          | -0.50~-0.11 | 0                      |              |             |    |                |        |                  |           |
|               | Placebo   | -0.32                 | -0.85~0.22  | 0                      |              |             |    |                |        |                  |           |
| CAU           | Placebo   | 0.01                  | -0.51~0.50  | 0                      |              |             |    |                |        |                  |           |

a) This cannot be calculated when the number of studies is smaller than 3



**eAppendix N. Sensitivity Analyses: Outliers Excluded**

| Contrast      |           | Network meta-analyses |             | Pairwise meta-analyses |              |             |                |        | Tau <sup>2</sup> | Egger (p)    |
|---------------|-----------|-----------------------|-------------|------------------------|--------------|-------------|----------------|--------|------------------|--------------|
|               |           | SMD                   | 95% CI      | N                      | SMD          | 95% CI      | I <sup>2</sup> | 95% CI |                  |              |
| Individual vs | Group     | 0.00                  | -0.14~0.15  | 7                      | <u>-0.32</u> | -0.63~-0.00 | 24             | 0~68   | 0.04             | 0.56         |
|               | GSH       | 0.12                  | -0.03~0.27  | 3                      | <u>-0.22</u> | -0.76~-0.32 | 24             | 0~79   | 0.05             | 0.08         |
|               | Telephone | 0.10                  | -0.12~0.31  | 4                      | -0.04        | -0.30~0.22  | 16             | 0~73   | 0.01             | 0.13         |
|               | USH       | <u>0.42</u>           | 0.25~0.58   | 0                      |              |             |                |        |                  |              |
|               | WL        | <u>0.91</u>           | 0.77~1.05   | 17                     | <u>-1.05</u> | -1.32~-0.78 | 53             | 4~72   | 0.16             | <u>0.002</u> |
|               | CAU       | <u>0.52</u>           | 0.41~0.63   | 28                     | <u>-0.45</u> | -0.57~-0.34 | 28             | 0~54   | 0.02             | <u>0.39</u>  |
|               | Placebo   | <u>0.41</u>           | -0.01~0.83  | 2                      | <u>-0.40</u> | -0.68~-0.11 | 0              | a)     | 0.00             | a)           |
| Group vs      | GSH       | 0.11                  | -0.04~0.27  | 4                      | 0.19         | -0.11~0.49  | 0              | 0~68   | 0.00             | 0.71         |
|               | Telephone | 0.09                  | -0.14~0.33  | 0                      |              |             |                |        |                  |              |
|               | USH       | <u>0.41</u>           | 0.24~0.58   | 1                      | -0.06        | -0.34~0.22  | a)             | a)     | a)               | a)           |
|               | WL        | <u>0.91</u>           | 0.76~1.05   | 12                     | <u>-1.23</u> | -1.59~-0.87 | 78             | 58~86  | 0.28             | 0.05         |
|               | CAU       | <u>0.52</u>           | 0.39~0.64   | 17                     | <u>-0.55</u> | -0.76~-0.36 | 70             | 46~80  | 0.11             | <u>0.05</u>  |
|               | Placebo   | 0.40                  | -0.04~0.85  | 0                      |              |             |                |        |                  |              |
|               | GSH vs    | Telephone             | -0.02       | -0.26~0.22             | 0            |             |                |        |                  |              |
| USH           |           | <u>0.30</u>           | 0.15~0.45   | 5                      | <u>-0.37</u> | -0.55~-0.18 | 17             | 0~70   | 0.01             | 0.55         |
| WL            |           | <u>0.79</u>           | 0.68~0.91   | 28                     | <u>-0.71</u> | -0.83~-0.59 | 29             | 0~55   | 0.03             | <u>0.02</u>  |
| CAU           |           | 0.40                  | 0.27~0.53   | 8                      | <u>-0.56</u> | -0.82~-0.30 | 79             | 52~88  | 0.10             | 0.19         |
| Placebo       |           | 0.29                  | -0.16~0.74  | 0                      |              |             |                |        |                  |              |
| Telephone vs  | USH       | <u>0.32</u>           | 0.08~0.56   | 0                      |              |             |                |        |                  |              |
|               | WL        | <u>0.81</u>           | 0.58~1.04   | 1                      | <u>-0.69</u> | -1.06~-0.31 | a)             | a)     | a)               | a)           |
|               | CAU       | <u>0.42</u>           | 0.21~0.63   | 5                      | <u>-0.42</u> | -0.61~-0.23 | 25             | 0~72   | 0.01             | 0.27         |
|               | Placebo   | 0.31                  | -0.16~0.79  | 0                      |              |             |                |        |                  |              |
| USH vs        | WL        | <u>0.50</u>           | 0.36~0.64   | 10                     | <u>-0.52</u> | -0.64~-0.41 | 3              | 0~54   | 0.00             | 0.11         |
|               | CAU       | 0.10                  | -0.04~0.24  | 9                      | -0.14        | -0.29~0.02  | 57             | 0~78   | 0.03             | <u>0.02</u>  |
|               | Placebo   | -0.01                 | -0.46~0.45  | 0                      |              |             |                |        |                  |              |
| WL vs         | CAU       | <u>-0.39</u>          | -0.52~-0.27 | 0                      |              |             |                |        |                  |              |
|               | Placebo   | <u>-0.50</u>          | -0.95~-0.06 | 0                      |              |             |                |        |                  |              |
| CAU           | Placebo   | -0.11                 | -0.55~0.33  | 0                      |              |             |                |        |                  |              |

a)

This cannot be calculated when the number of studies is smaller than 3.

**eAppendix O.** Sensitivity Analyses: Non-internet-based Guided and Unguided Interventions Excluded

| Contrast      |           | Network meta-analyses |             | Pairwise meta-analyses |              |             |                |        | Tau <sup>2</sup> | Egger (p)    |
|---------------|-----------|-----------------------|-------------|------------------------|--------------|-------------|----------------|--------|------------------|--------------|
|               |           | SMD                   | 95% CI      | N                      | SMD          | 95% CI      | I <sup>2</sup> | 95% CI |                  |              |
| Individual vs | Group     | -0.15                 | -0.39~0.10  | 5                      | -0.39        | -0.82~0.03  | 43             | 0~78   | 0.10             | 0.62         |
|               | GSH       | 0.22                  | -0.08~0.52  | 0                      |              |             |                |        |                  |              |
|               | Telephone | -0.02                 | -0.41~0.37  | 4                      | -0.04        | -0.30~0.22  | 16             | 0~73   | 0.01             | 0.13         |
|               | USH       | <u>0.46</u>           | 0.13~0.78   | 0                      |              |             |                |        |                  |              |
|               | WL        | <u>1.02</u>           | 0.78~1.27   | 14                     | <u>-1.00</u> | -1.26~-0.73 | 48             | 0~79   | 0.12             | <u>0.004</u> |
|               | CAU       | <u>0.61</u>           | 0.42~0.80   | 30                     | <u>-0.52</u> | -0.65~-0.39 | 51             | 18~67  | 0.07             | 0.22         |
|               | Placebo   | <u>0.42</u>           | -0.39~1.23  | 2                      | <u>-0.40</u> | -0.68~-0.11 | 0              | a)     | 0.00             | a)           |
| Group vs      | GSH       | <u>0.37</u>           | 0.08~0.66   | 2                      | 0.20         | -0.17~0.56  | 0              | a)     | 0.00             | a)           |
|               | Telephone | 0.13                  | -0.29~0.55  | 0                      |              |             |                |        |                  |              |
|               | USH       | <u>0.60</u>           | 0.28~0.92   | 1                      | -0.06        | -0.34~0.22  |                |        |                  |              |
|               | WL        | <u>1.17</u>           | 0.93~1.41   | 15                     | <u>-1.47</u> | -1.92~-1.02 | 93             | 91~95  | 0.67             | <u>0.004</u> |
|               | CAU       | <u>0.75</u>           | 0.54~0.96   | 21                     | <u>-0.83</u> | -1.12~-0.54 | 88             | 84~91  | 0.39             | <u>0.003</u> |
|               | Placebo   | 0.57                  | -0.28~1.41  | 0                      |              |             |                |        |                  |              |
|               | GSH vs    | Telephone             | -0.24       | -0.69~0.21             | 0            |             |                |        |                  |              |
| USH           |           | 0.23                  | -0.09~0.56  | 4                      | <u>-0.26</u> | -0.45~-0.07 | 0              | 0~68   | 0.00             | 0.51         |
| WL            |           | <u>0.80</u>           | 0.58~1.02   | 22                     | <u>-0.72</u> | -0.92~-0.53 | 75             | 61~83  | 0.16             | <u>0.06</u>  |
| CAU           |           | <u>0.39</u>           | 0.11~0.66   | 5                      | <u>-0.45</u> | -0.66~-0.24 | 52             | 0~80   | 0.03             | <u>0.04</u>  |
| Placebo       |           | 0.20                  | -0.66~1.06  | 0                      |              |             |                |        |                  |              |
| Telephone vs  | USH       | <u>0.47</u>           | 0.01~0.94   | 0                      |              |             |                |        |                  |              |
|               | WL        | <u>1.04</u>           | 0.62~1.46   | 1                      | <u>-0.69</u> | -1.06~-0.31 | a)             | a)     | a)               | a)           |
|               | CAU       | <u>0.63</u>           | 0.25~1.00   | 6                      | <u>-0.63</u> | -1.06~-0.19 | 87             | 71~92  | 0.25             | 0.85         |
|               | Placebo   | 0.44                  | -0.46~1.33  | 0                      |              |             |                |        |                  |              |
| USH vs        | WL        | <u>0.57</u>           | 0.29~0.85   | 9                      | <u>-0.49</u> | -0.63~-0.35 | 30             | 0~67   | 0.01             | 0.51         |
|               | CAU       | 0.15                  | -0.14~0.45  | 7                      | -0.17        | -0.36~0.02  | 68             | 0~83   | 0.04             | <u>0.01</u>  |
|               | Placebo   | -0.04                 | -0.91~0.83  | 0                      |              |             |                |        |                  |              |
| WL vs         | CAU       | <u>-0.42</u>          | -0.65~-0.18 | 0                      |              |             |                |        |                  |              |
|               | Placebo   | -0.61                 | -1.45~0.24  | 0                      |              |             |                |        |                  |              |
| CAU           | Placebo   | -0.19                 | -1.02~0.64  | 0                      |              |             |                |        |                  |              |

a)

This cannot be calculated when the number of studies is smaller than 3.

**eAppendix P. Sensitivity Analyses of Acceptability: Non-internet-based Guided and Unguided Interventions Excluded**

| Contrast      |           | Network meta-analyses |           | Pairwise meta-analyses |             |           |                |        |                  |           |
|---------------|-----------|-----------------------|-----------|------------------------|-------------|-----------|----------------|--------|------------------|-----------|
|               |           | RR                    | 95% CI    | N                      | RR          | 95% CI    | I <sup>2</sup> | 95% CI | Tau <sup>2</sup> | Egger (p) |
| Individual vs | Group     | 1.02                  | 0.78~1.34 | 3                      | 1.28        | 0.63~2.61 | 0              | 0~73   | 0.00             | 0.60      |
|               | GSH       | <u>1.41</u>           | 1.04~1.92 | 0                      |             |           |                |        |                  |           |
|               | Telephone | 0.97                  | 0.70~1.34 | 4                      | 0.97        | 0.50~1.89 | 73             | 0~88   | 0.23             | 0.89      |
|               | USH       | 1.13                  | 0.84~1.52 | 0                      |             |           |                |        |                  |           |
|               | WL        | 0.87                  | 0.66~1.14 | 10                     | 0.83        | 0.54~1.28 | 0              | 0~53   | 0.00             | 0.29      |
|               | CAU       | 1.02                  | 0.84~1.24 | 28                     | 1.01        | 0.82~1.24 | 17             | 0~48   | 0.04             | 0.46      |
|               | Placebo   | <u>1.92</u>           | 1.08~3.39 | 2                      | 2.29        | 0.65~8.04 | 86             | a)     | 0.71             | a)        |
| Group vs      | GSH       | <u>1.38</u>           | 1.03~1.85 | 0                      |             |           |                |        |                  |           |
|               | Telephone | 0.95                  | 0.65~1.40 | 0                      |             |           |                |        |                  |           |
|               | USH       | 1.11                  | 0.84~1.47 | 1                      | 0.79        | 0.56~1.12 |                |        |                  |           |
|               | WL        | 0.85                  | 0.67~1.09 | 11                     | 0.95        | 0.67~1.35 | 37             | 0~68   | 0.10             | 0.18      |
|               | CAU       | 1.00                  | 0.81~1.25 | 16                     | 0.99        | 0.79~1.24 | 10             | 0~51   | 0.02             | 0.16      |
|               | Placebo   | <u>1.88</u>           | 1.00~3.55 | 0                      |             |           |                |        |                  |           |
|               | GSH vs    | Telephone             | 0.69      | 0.45~1.04              | 0           |           |                |        |                  |           |
| USH           |           | 0.80                  | 0.61~1.06 | 4                      | 0.66        | 0.39~1.11 | 0              | 0~68   | 0.00             | 0.66      |
| WL            |           | <u>0.62</u>           | 0.50~0.76 | 22                     | <u>0.67</u> | 0.51~0.89 | 44             | 0~65   | 0.14             | 0.77      |
| CAU           |           | <u>0.73</u>           | 0.56~0.95 | 4                      | <u>0.63</u> | 0.39~1.00 | 54             | 0~83   | 0.11             | 0.59      |
| Placebo       |           | 1.36                  | 0.71~2.59 | 0                      |             |           |                |        |                  |           |
| Telephone vs  | USH       | 1.17                  | 0.78~1.75 | 0                      |             |           |                |        |                  |           |
|               | WL        | 0.90                  | 0.61~1.33 | 1                      | 0.19        | 0.02~1.61 | a)             | a)     | a)               | a)        |
|               | CAU       | 1.06                  | 0.76~1.47 | 6                      | 1.12        | 0.79~1.61 | 0              | 0~61   | 0.00             | 0.33      |
|               | Placebo   | <u>1.98</u>           | 1.03~3.83 | 0                      |             |           |                |        |                  |           |
| USH vs        | WL        | <u>0.77</u>           | 0.61~0.96 | 9                      | <u>0.70</u> | 0.52~0.93 | 53             | 0~76   | 0.09             | 0.91      |
|               | CAU       | 0.90                  | 0.70~1.16 | 5                      | 1.02        | 0.84~1.25 | 0              | 0~64   | 0.00             | 0.77      |
|               | Placebo   | 1.70                  | 0.89~3.22 | 0                      |             |           |                |        |                  |           |
| WL vs         | CAU       | 1.18                  | 0.93~1.49 | 0                      |             |           |                |        |                  |           |
|               | Placebo   | <u>2.20</u>           | 1.17~4.14 | 0                      |             |           |                |        |                  |           |
| CAU           | Placebo   | <u>1.88</u>           | 1.03~3.42 | 0                      |             |           |                |        |                  |           |

a) This cannot be calculated when the number of studies is smaller than 3.
